# Supplementary material for: The Furvela tent-trap Mk 1.1 for the collection of outdoor biting mosquitoes
Source: PeerJ. 2017 Nov 15;5:e3848. doi: 10.7717/peerj.3848 (PMC5694212; doi:10.7717/peerj.3848)
Supplement: Supplemental Information 2 — Dataset from Kyamyorwa, Tanzania used for the comparison between window-trap and tent-trap collections 2015. [file peerj-05-3848-s002.xlsx]

## Sheet: DATA (INCL DIFFERENT TIMES)
Spray	Date	ISO week	House	house Number	Collection 2	Collector	AG unfed	AG part	AG fed	AG semi	AG gravid	AG males	AF unfed	AF part	AF fed	AF semi	AF gravid	AF males	An. coustani	An ph	An zei	An sq	CQ	MS	Cx tri	CX sp	Cx male	ODDS	Beem #	EP number	Ag Virgin	Ag plug	Ag NII	A sac	B sac	C sac	D sac	PAROUS	Negative	Positive	number	Observations
before	2014-10-26	43	2		T	YK	45	0	0	0	0	0	2	0	0	0	0	0	0	0	0	0	0	0	0	0
before	2014-10-26	43	2		T	YK	173	0	0	0	0	0	5	0	0	0	0	0	0	0	0	0	1	2	0	3
before	2014-11-19	47	2		T	DC	34	0	0	0	0	0	0	0	0	0	0	0	0	0	0	0	0	0	0	0
before	2014-11-19	47	2		T	DC	243	0	0	0	0	0	0	0	0	0	0	0	0	0	0	0	8	8	0	10
before	2014-12-07	49	2		T	MR	35	0	0	0	0	0	0	0	0	0	0	0	0	0	0	0	0	0	0	0
before	2014-12-07	49	2		T	MR	65	0	0	0	0	0	0	0	0	0	0	0	0	0	0	0	0	0	0	0
before	2015-01-22	4	2		T	FD	3	0	0	0	0	0	0	0	0	0	0	0	0	0	0	0	0	1	0	0
before	2015-01-22	4	2		T	FD	9	0	0	0	0	0	0	0	0	0	0	0	0	0	0	0	1	1	2	0
before	2015-01-22	4	2		T	FD	13	0	0	0	0	0	0	0	0	0	0	0	0	0	1	0	2	5	0	0
before	2015-01-22	4	2		T	FL	54	0	0	0	0	0	0	0	0	0	0	0	0	0	1	0	5	11	2	3
before	2015-01-22	4	2		T	FD	95	0	0	0	0	0	0	0	0	0	0	0	0	0	0	0	2	4	5	4
before	2015-01-22	4	2		T	FD	117	0	0	0	0	0	2	0	0	0	0	0	0	0	1	0	0	11	0	4
before	2015-01-27	5	2		T	FD	3	0	0	0	0	1	17	0	0	0	0	0	0	0	0	0	5	9	0	5
before	2015-01-27	5	2		T	FL	4	0	0	0	0	0	1	0	0	0	0	0	0	0	0	0	11	10	0	8
before	2015-01-27	5	2		T	FL	4	0	1	0	0	0	0	0	0	0	0	0	0	0	0	0	0	4	0	0
before	2015-01-27	5	2		T	JC	11	0	0	0	0	1	0	0	0	0	0	0	0	0	0	0	0	0	0	0
before	2015-01-27	5	2		T	JC	12	0	0	0	0	0	0	0	0	0	0	0	0	0	0	0	3	1	0	0
before	2015-01-27	5	2		T	FL	17	0	0	0	0	0	0	0	0	0	0	0	0	0	0	0	2	2	0	2
before	2015-01-27	5	2		T	FL	28	0	0	0	0	0	0	0	0	0	0	0	0	0	0	0	1	12	0	6
before	2015-01-27	5	2		T	JC	29	0	0	0	0	0	0	0	0	0	0	0	0	0	0	0	1	2	1	0
before	2015-01-27	5	2		T	JC	43	0	0	0	0	0	1	0	0	0	0	0	0	0	0	0	0	0	0	0
before	2015-01-29	5	2		T	FD	20	0	0	0	0	0	0	0	0	0	0	0	0	0	0	0	1	0	0	0
before	2015-01-29	5	2		T	DC	25	0	0	0	0	1	0	0	0	0	0	0	0	0	0	0	22	369	0	2
before	2015-01-29	5	2		T		29	0	0	0	0	0	0	0	0	0	0	0	0	0	0	0	0	0	0	4
before	2015-01-29	5	2		T		34	0	0	0	0	0	0	0	0	0	0	0	0	0	0	0	0	0	0	0
after	2015-02-01	5	2		T	YK	30	0	0	0	0	0	2	0	0	0	0	0	0	0	0	0	2	4	0	0
after	2015-02-04	6	2		T	YK	59	0	0	0	0	0	0	0	0	0	0	0	0	0	0	0	0	0	0	0
after	2015-02-04	6	2		T	JC	27	0	0	0	0	0	0	0	0	0	0	0	0	0	0	0	0	0	0	0
after	2015-02-05	6	2		T	JC	27	0	0	0	0	0	1	0	0	0	0	0	0	0	0	0	1	0	3	3
after	2015-02-09	7	2		T	MR	23	0	0	0	0	1	0	0	0	0	0	0	0	0	0	0	0	1	2	3
after	2015-02-11	7	2		T	DC	30	0	0	0	0	0	0	0	0	0	0	0	0	0	0	0	0	2	0	1
after	2015-02-11	7	2		T	DC	87	2	1	0	0	0	0	0	0	0	0	0	0	0	0	0	0	2	0	0
after	2015-02-16	8	2		T	YK	75	2	0	0	0	0	0	0	0	0	0	0	0	0	0	0	2	0	0	0
after	2015-02-18	8	2		T	YK	43	0	0	0	0	0	0	0	0	0	0	0	0	0	0	0	0	0	0	0
after	2015-02-25	9	2		T	YK	20	0	0	0	0	0	0	0	0	0	0	0	0	0	0	0	0	0	0	0
after	2015-03-04	10	2		T	YK	8	0	0	0	0	0	0	0	0	0	0	0	0	0	1	0	9	0	0	6
after	2015-03-05	10	2		T	JC	8	0	0	0	0	0	0	0	0	0	0	0	0	0	0	0	0	1	0	1
after	2015-03-09	11	2		T	YK	11	0	0	0	0	0	0	0	0	0	0	0	0	0	0	0	0	0	0	0
after	2015-04-13	16	2		T	JC	1	0	0	0	0	0	0	0	0	0	0	0	0	0	0	0	0	2	0	1
after	2015-04-13	16	2		T	MS	1	0	0	0	0	0	0	0	0	0	0	0	0	0	0	0	0	4	0	0
after	2015-04-13	16	2		T	JC	4	0	0	0	0	0	0	0	0	0	0	0	0	0	0	0	0	0	0	0
after	2015-04-13	16	2		T	MS	5	0	0	0	0	0	0	0	0	0	0	0	0	0	0	0	0	1	0	3
after	2015-04-14	16	2		T	GM	1	0	0	0	0	0	0	0	0	0	0	0	0	0	0	0	3	11	0	12
after	2015-04-14	16	2		T	GM	1	0	0	0	0	0	0	0	0	0	0	0	0	0	0	0	1	8	0	2
after	2015-04-14	16	2		T	YK	2	1	2	0	0	0	0	0	0	0	0	0	0	0	0	0	0	1	0	0
after	2015-04-15	16	2		T	JC	5	0	0	0	0	0	0	0	0	0	0	0	0	0	0	0	1	0	0	1
after	2015-04-20	17	2		T	RAM	2	0	0	0	0	0	0	0	0	0	0	0	0	0	0	0	5	5	0	3		1 Y
after	2015-04-20	17	2		T	YK	5	0	0	0	0	0	0	0	0	0	0	0	0	0	1	0	1	12	0	34		8 YELLOW PS
after	2015-04-24	17	2		T	ram	1	0	0	0	0	0	0	0	0	0	0	0	0	0	1	0	2	10	0	0
after	2015-04-28	18	2		T	RAM	8	0	0	0	0	0	0	0	0	0	0	0	0	0	0	0	4	21	0	9
after	2015-05-21	21	2		T	dc	13	0	0	0	0	0	0	0	0	0	0	0	0	0	0	0	4	11	0	6
after	2015-05-26	22	2		T	dc	12	0	0	0	0	0	0	0	0	0	0	0	0	0	1	1	2	6	0	0
after	2015-06-02	23	2		T	yk	0	0	0	0	0	0	0	0	0	0	0	0	0	0	0	0	2	5	0	6
after	2015-06-16	25	2		T	dc	11	0	0	0	0	0	0	0	0	0	0	0	0	0	0	0	0	4	0	1
after	2015-06-25	26	2		T	dc	3	0	0	0	0	0	0					0	0	0	0	0	4	6	0	0
before	2014-10-23	43	2		WM	YK	38	0	0	0	0	0	4	0	0	0	0	0	0	0	0	0	0	0	0	0
before	2014-10-24	43	2		WM	YK	16	0	0	0	0	0	1	0	0	0	0	0	0	0	0	0	0	0	0	1
before	2014-10-25	43	2		WM	YK	10	0	0	0	0	3	0	0	0	0	0	0	0	0	0	0	0	0	0	0
before	2014-10-27	44	2		WM	YK	12	0	0	0	0	0	0	0	0	0	0	0	0	0	0	0	0	8	0	2
before	2014-10-28	44	2		WM	YK	6	0	0	0	0	1	0	0	0	0	0	0	0	0	0	0	0	0	0	1
before	2014-10-28	44	2		WM	YK	20	0	0	0	0	0	0	0	0	0	0	0	0	0	0	0	0	0	0	0
before	2014-10-29	44	2		WM	YK	44	0	0	0	0	1	0	0	0	0	0	0	0	0	0	0	0	0	0	0
before	2014-10-30	44	2		WM	YK	33	0	0	0	0	2	0	0	0	0	0	0	0	0	0	0	0	0	0	1
before	2014-10-31	44	2		WM	YK	29	0	0	0	0	1	0	0	0	0	0	0	0	0	0	0	0	0	0	1
before	2014-11-11	46	2		WM	YK	110	0	0	0	0	1	0	0	0	0	0	0	0	0	0	0	3	14	0	10
before	2014-11-12	46	2		WM	YK	265	0	0	0	0	17	0	0	0	0	0	0	0	0	0	0	0	2	0	1
before	2014-11-13	46	2		WM	YK	307	0	0	0	0	15	6	0	0	0	0	0	0	0	0	0	0	1	0	1
before	2014-11-14	46	2		WM	YK	103	0	0	0	0	7	4	0	0	0	0	0	0	0	0	0	0	15	0	21
before	2014-11-15	46	2		WM	YK	202	0	0	0	0	0	0	0	0	0	0	0	0	0	0	0	0	0	0	1
before	2014-11-16	46	2		WM	YK	28	0	0	0	0	9	1	0	0	0	0	0	0	0	0	0	0	1	0	2
before	2014-11-16	46	2		WM	YK	118	0	18	0	0	1	0	0	0	0	0	0	0	0	0	0	0	0	0	0
before	2014-11-17	47	2		WM	YK	80	0	0	0	0	5	0	0	0	0	0	0	0	0	0	0	0	0	0	0
before	2014-11-18	47	2		WM	YK	84	0	0	0	1	4	0	0	0	0	0	0	0	0	0	0	0	0	0	0
before	2014-11-18	47	2		WM	YK	321	0	2	0	0	0	0	0	0	0	0	0	0	0	0	0	0	0	0	1
before	2014-11-19	47	2		WM	YK	8	0	0	0	0	18	0	0	0	0	0	0	0	0	0	0	0	0	0	1
before	2014-11-19	47	2		WM	YK	29	0	0	0	0	7	0	0	0	0	0	0	0	0	0	0	0	0	0	3
before	2014-11-19	47	2		WM	YK	99	0	0	0	0	17	2	0	0	0	0	0	0	0	0	0	0	2	0	1
before	2014-11-19	47	2		WM	YK	141	0	0	0	0	0	0	0	0	0	0	0	0	0	0	0	0	0	0	0
before	2014-11-20	47	2		WM	YK	14	0	0	0	0	0	0	0	0	0	0	0	0	0	0	0	0	1	0	2
before	2014-11-20	47	2		WM	YK	146	0	0	0	0	0	0	0	0	0	0	0	0	0	0	0	0	0	0	0
before	2014-11-21	47	2		WM	YK	83	0	0	0	0	1	1	0	0	0	0	0	0	0	0	0	0	0	0	0
before	2014-11-22	47	2		WM	YK	20	0	0	0	0	1	0	0	0	0	0	0	0	0	0	0	0	5	0	0
before	2014-11-23	47	2		WM	YK	113	0	0	0	0	4	0	0	0	0	0	0	0	0	0	0	0	0	0	1
before	2014-11-24	48	2		WM	YK	1018	0	0	0	0	0	0	0	0	0	0	0	0	0	0	0	0	1	0	0
before	2014-12-03	49	2		WM	YK	81	0	0	0	0	130	1	0	0	0	0	0	0	0	0	0	0	0	0	0
before	2015-01-06	2	2		WM	YK	543	0	0	0	0	3	2	0	0	0	0	0	0	0	0	0	0	0	0	5
before	2015-01-09	2	2		WM	YK	63	0	0	0	0	1	0	0	0	0	0	0	0	0	0	0	0	0	0	1
before	2015-01-09	2	2		WM	YK	68	0	0	0	0	9	2	0	0	0	0	0	0	0	0	0	0	0	0	10
before	2015-01-09	2	2		WM	YK	177	0	0	0	0	13	0	0	0	0	0	1	0	0	0	0	0	0	0	0
before	2015-01-10	2	2		WM	YK	23	0	0	0	0	0	0	0	0	0	0	0	0	0	0	0	0	0	0	10
before	2015-01-10	2	2		WM	YK	260	0	0	21	0	0	0	0	0	0	0	0	0	0	0	0	0	0	0	0
before	2015-01-11	2	2		WM	YK	91	2	0	0	0	0	0	0	0	0	0	0	0	0	0	0	0	0	0	8
before	2015-01-11	2	2		WM	YK	482	0	0	0	0	0	0	0	0	0	0	0	0	0	0	0	0	0	0	0
before	2015-01-12	3	2		WM	YK	34	1	0	0	0	4	0	0	0	0	0	0	0	0	0	0	0	3	0	0
before	2015-01-12	3	2		WM	YK	270	0	0	0	0	17	2	0	0	0	0	1	0	0	0	0	0	0	0	1
before	2015-01-13	3	2		WM	YK	9	0	0	0	0	0	0	0	0	0	0	0	0	0	0	0	1	1	0	2
before	2015-01-13	3	2		WM	YK	21	0	2	0	0	1	0	1	0	0	0	0	0	0	0	0	0	0	0	8
before	2015-01-14	3	2		WM	YK	5	0	0	0	0	1	0	0	0	0	0	0	0	0	0	0	0	0	0	1
before	2015-01-15	3	2		WM	YK	108	0	0	0	0	2	2	0	0	0	0	0	0	0	0	0	0	0	0	0
before	2015-01-16	3	2		WM	YK	172	0	0	11	4	0	0	0	0	0	0	0	0	0	0	0	0	1	0	0
before	2015-01-17	3	2		WM	YK	16	2	0	0	0	0	0	0	0	0	0	0	0	0	0	0	0	0	0	2
before	2015-01-17	3	2		WM	YK	255	0	0	0	0	8	0	0	0	0	0	0	0	0	0	0	0	0	0	0
before	2015-01-18	3	2		WM	YK	307	0	0	0	0	18	0	0	0	0	0	0	0	0	0	0	0	0	0	0
before	2015-01-19	4	2		WM	YK	0	0	0	0	0	0	0	0	0	0	0	0	0	0	0	0	0	0	0	0
before	2015-01-19	4	2		WM	YK	25	0	0	0	0	0	0	0	0	0	0	0	0	0	0	0	0	0	0	0
before	2015-01-19	4	2		WM	YK	42	0	0	0	0	6	1	0	0	0	0	0	0	1	0	0	0	0	0	0
before	2015-01-19	4	2		WM	YK	51	0	0	0	0	0	0	0	0	0	0	0	0	0	0	0	0	0	0	0
before	2015-01-19	4	2		WM	YK	105	0	0	0	0	0	0	0	0	0	0	0	0	0	0	0	0	0	0	0
before	2015-01-21	4	2		WM	YK	180	0	0	0	0	3	0	0	0	0	0	0	0	0	0	0	0	0	0	2
before	2015-01-22	4	2		WM	YK	24	0	0	0	0	3	0	0	0	0	0	0	0	0	0	0	0	0	0	0
before	2015-01-22	4	2		WM	FL	30	1	0	0	3	24	2	0	0	0	0	0	0	0	0	0	0	0	0	1
before	2015-01-22	4	2		WM	FL	44	0	0	0	0	2	0	0	0	0	0	0	0	0	0	0	0	0	0	0
before	2015-01-22	4	2		WM	FL	50	0	0	0	0	2	1	0	0	0	0	0	0	0	0	0	0	1	0	1
before	2015-01-22	4	2		WM	FL	73	0	0	0	0	0	0	0	0	0	0	0	0	0	0	0	0	1	1	0
before	2015-01-22	4	2		WM	FL	143	0	0	0	0	5	1	0	0	0	0	0	0	0	0	0	0	0	0	0
before	2015-01-23	4	2		WM	YK	37	0	0	0	0	0	0	0	0	0	0	0	0	0	0	0	0	0	0	1
before	2015-01-25	4	2		WM	YK	204	0	0	0	0	0	0	0	0	0	0	0	0	0	20	0	6	73	0	138
before	2015-01-27	5	2		WM	YK	16	1	3	0	1	0	1	0	0	0	0	0	0	0	0	0	0	0	0	0
before	2015-01-27	5	2		WM	YK	20	0	0	0	0	0	1	0	0	0	0	0	0	0	0	0	0	0	0	0
before	2015-01-27	5	2		WM	YK	20	1	0	0	0	1	0	0	0	0	0	0	0	0	0	0	0	0	0	0
before	2015-01-27	5	2		WM	YK	39	0	1	0	0	1	2	0	0	0	0	0	0	0	0	0	0	0	0	0
before	2015-01-27	5	2		WM	YK	128	0	0	0	0	12	1	0	0	0	0	0	0	0	0	0	0	0	0	1
before	2015-01-29	5	2		WM	YK	5	0	0	0	0	0	0	0	0	0	0	0	0	0	0	0	0	0	0	0
before	2015-01-29	5	2		WM	YK	6	0	0	0	0	0	0	0	0	0	0	0	0	0	0	0	0	0	0	0
before	2015-01-29	5	2		WM	YK	23	0	0	0	0	0	0	0	0	0	0	0	0	0	0	0	0	0	0	0
before	2015-01-29	5	2		WM	YK	27	0	0	0	0	4	0	0	0	0	0	1	0	0	0	0	0	0	0	0
before	2015-01-29	5	2		WM	YK	68	0	0	0	0	0	3	0	0	0	0	0	0	0	0	0	0	0	0	0
before	2015-01-29	5	2		WM	YK	94	0	0	0	0	0	5	0	0	0	0	0	0	0	0	0	0	0	0	0
after	2015-01-31	5	2		WM	YK	154	0	0	0	0	6	1	0	0	0	0	0	0	0	0	0	0	0	2	1
after	2015-02-01	5	2		WM	YK	60	0	0	0	0	7	2	0	0	0	0	0	0	0	0	0	0	2	0	0
after	2015-02-01	5	2		WM	YK	62	0	0	0	0	0	0	0	0	0	0	0	0	0	0	0	0	0	0	0
after	2015-02-03	6	2		WM	YK	80	0	0	0	0	0	0	0	0	0	0	0	0	0	0	0	0	0	1	15
after	2015-02-04	6	2		WM	YK	14	0	0	0	0	5	0	0	0	0	0	0	0	0	0	0	1	31	0	6
after	2015-02-04	6	2		WM	YK	19	0	0	0	0	0	0	0	0	0	0	0	0	0	0	0	0	0	0	0
after	2015-02-05	6	2		WM	YK	19	0	0	0	0	0	1	0	0	0	0	0	0	0	0	0	0	0	0	0
after	2015-02-07	6	2		WM	YK	19	0	0	0	0	0	0	0	0	0	0	0	0	0	0	0	0	0	1	0
after	2015-02-08	6	2		WM	YK	40	0	0	0	0	9	0	0	0	0	0	0	0	0	0	0	0	0	0	0
after	2015-02-09	7	2		WM	YK	59	0	0	0	0	3	0	0	0	0	0	0	0	0	0	0	0	0	0	1
after	2015-02-10	7	2		WM	YK	31	0	0	0	0	7	0	0	0	0	0	1	0	0	0	0	0	0	0	3
after	2015-02-11	7	2		WM	YK	37	0	0	0	0	2	0	0	0	0	0	0	0	0	0	0	0	0	0	0
after	2015-02-13	7	2		WM	YK	43	0	0	0	0	3	0	0	0	0	0	0	0	0	0	0	1	0	0	21
after	2015-02-14	7	2		WM	YK	47	0	0	0	0	0	0	0	0	0	0	0	0	0	0	0	5	0	0	0
after	2015-02-15	7	2		WM	YK	13	0	0	0	0	4	0	0	0	0	0	0	0	0	0	0	2	0	0	0
after	2015-02-16	8	2		WM	YK	40	0	0	0	0	7	0	0	0	0	0	0	0	0	0	0	2	0	0	20
after	2015-02-17	8	2		WM	YK	15	0	0	0	0	1	0	0	0	0	0	0	0	0	0	0	0	0	0	0
after	2015-02-18	8	2		WM	YK	7	0	0	0	0	4	0	0	0	0	0	0	0	0	0	0	0	0	0	0
after	2015-02-19	8	2		WM	YK	3	0	0	1	0	0	0	0	0	0	0	0	0	0	0	0	1	1	0	0
after	2015-02-20	8	2		WM	YK	18	0	0	0	0	0	0	0	0	0	0	0	0	0	0	0	0	0	0	0
after	2015-02-21	8	2		WM	YK	1	0	0	0	0	0	0	0	0	0	0	0	0	0	0	0	0	1	0	0
after	2015-02-23	9	2		WM	YK	19	0	0	1	0	0	0	0	0	0	0	0	0	0	0	0	0	2	0	0
after	2015-02-26	9	2		WM	YK	8	0	0	0	0	0	0	0	0	0	0	0	0	0	0	0	0	0	0	0
after	2015-02-27	9	2		WM	YK	5	0	0	15	3	0	0	0	0	0	0	0	0	0	0	0	0	0	0	1
after	2015-02-28	9	2		WM	YK	20	0	0	0	0	0	0	0	0	0	0	0	0	0	0	0	0	0	0	3
after	2015-03-05	10	2		WM	YK	4	0	1	0	0	0	0	0	0	0	0	0	0	0	0	0	0	0	0	4
after	2015-03-09	11	2		WM	YK	7	0	0	0	0	0	0	0	0	0	0	0	0	0	0	0	0	0	0	0
after	2015-03-10	11	2		WM	YK	9	0	0	0	0	0	0	0	0	0	0	0	0	0	0	0	0	0	0	0
after	2015-03-12	11	2		WM	YK	20	0	0	0	0	1	0	0	0	0	0	0	0	0	0	0	0	0	1	2
after	2015-03-13	11	2		WM	YK	5	0	0	0	0	2	0	0	0	0	0	0	0	0	0	0	0	0	0	0
after	2015-03-14	11	2		WM	YK	8	0	0	0	0	5	0	0	0	0	0	0	0	0	0	0	0	0	0	2
after	2015-03-22	12	2		WM	YK	8	0	0	0	0	2	0	0	0	0	0	0	0	0	0	0	0	0	0	1
after	2015-04-20	17	2		WM	YK	0	0	0	0	0	0	0	0	0	0	0	0	0	0	0	0	0	0	0	0
after	2015-06-09	24	2		WM	YK	4	0	1	0	0	0	0	0	0	0	0	0	0	0	0	0	0	0	0	1
after	2015-06-10	24	2		WM	YK	7	0	0	0	0	0	0	0	0	0	0	0	0	0	0	0	0	1	0	4
after	2015-06-11	24	2		WM	YK	2	0	0	0	0	0	0	0	0	0	0	0	0	0	0	0	0	0	0	0
after	2015-06-12	24	2		WM	YK	0	0	0	0	0	0	0	0	0	0	0	0	0	0	0	0	0	0	0	0		no sleeper
after	2015-06-15	25	2		WM	YK	0	0	0	0	0	0	0	0	0	0	0	0	0	0	0	0	0	0	0	0		no sleeper
after	2015-06-16	25	2		WM	YK	0	0	0	0	0	0	0	0	0	0	0	0	0	0	0	0	0	0	0	0		no sleeper
after	2015-06-17	25	2		WM	YK	1	0	0	0	0	0	0	0	0	0	0	0	0	0	0	0	0	0	0	0

## Sheet: BY ISSO WEEK
ISO week	House	house Number	Collection	Collection 2	Collector	Tent-trap	Window-trap
43			T			109
47			T			138.5	94.8333
49			T			50	81
50
51
52
1
2
3
4			T			48.5	72
5			T			20.6429	51.5714
6			T			43	31.8333
7			T			46.6667	38.3333
8			T			59	14
9			T			20	13
10			T			8	4
11			T			11	9.8
12
13
14
15
16
17			T			2.5
18			T			2.66667
19			T			8
20
21
22			T			13
23			T			12
24			T			0
25			T			11	0.333333
26			T			3
43			W			21.3333
44			W			24
46			W			161.857
47			W			94.8333
48			W			1018
49			W			81
2			W			213.375
3			W			119.7
4			W			72
5			W			51.5714
6			W			31.8333
7			W			38.3333
8			W			14
9			W			13
10			W			4
11			W			9.8
12			W			8
17			W			0
24			W			3.25
25			W			0.333333

## Sheet: PROPORTIONS WINDOW TENT
Collection 2	Collector	AG unfed	AF unfed	An. coustani	An ph	An zei	An sq	CQ	MS	Cx tri	CX sp
L Average		51.1892	1	0.027027	0.0405405	1.75676	0.0945946	3.2973	18.6486	0.432432	25.1757
T Average		28.3017	0.430168	0.0726257	0.0446927	1.47486	0.0670391	2.87151	16.1508	0.72067	14.2291
W Average		31.0192	0.172249	0.0191388	0.00239234	0.12201	0.00239234	0.169856	1.11244	0.0861244	4.2823

## Sheet: TOTALS BY DAY
Date
2014-10-26		T	218
2014-11-19		T	277
2014-12-07		T	100
2015-01-22		T	291
2015-01-27		T	151
2015-01-29		T	108
2015-02-01		T	30
2015-02-04		T	86
2015-02-05		T	27
2015-02-09		T	23
2015-02-11		T	117
2015-02-16		T	75
2015-02-18		T	43
2015-02-25		T	20
2015-03-04		T	8
2015-03-05		T	8
2015-03-09		T	11
2015-04-13		T	11
2015-04-14		T	4
2015-04-15		T	5
2015-04-20		T	7
2015-04-24		T	1
2015-04-28		T	8
2015-05-21		T	13
2015-05-26		T	12
2015-06-02		T	0
2015-06-16		T	11
2015-06-25		T	3
2014-10-23		W	38
2014-10-24		W	16
2014-10-25		W	10
2014-10-27		W	12
2014-10-28		W	26
2014-10-29		W	44
2014-10-30		W	33
2014-10-31		W	29
2014-11-11		W	110
2014-11-12		W	265
2014-11-13		W	307
2014-11-14		W	103
2014-11-15		W	202
2014-11-16		W	146
2014-11-17		W	80
2014-11-18		W	405
2014-11-19		W	277
2014-11-20		W	160
2014-11-21		W	83
2014-11-22		W	20
2014-11-23		W	113
2014-11-24		W	1018
2014-12-03		W	81
2015-01-06		W	543
2015-01-09		W	308
2015-01-10		W	283
2015-01-11		W	573
2015-01-12		W	304
2015-01-13		W	30
2015-01-14		W	5
2015-01-15		W	108
2015-01-16		W	172
2015-01-17		W	271
2015-01-18		W	307
2015-01-19		W	223
2015-01-21		W	180
2015-01-22		W	364
2015-01-23		W	37
2015-01-25		W	204
2015-01-27		W	223
2015-01-29		W	223
2015-01-31		W	154
2015-02-01		W	122
2015-02-03		W	80
2015-02-04		W	33
2015-02-05		W	19
2015-02-07		W	19
2015-02-08		W	40
2015-02-09		W	59
2015-02-10		W	31
2015-02-11		W	37
2015-02-13		W	43
2015-02-14		W	47
2015-02-15		W	13
2015-02-16		W	40
2015-02-17		W	15
2015-02-18		W	7
2015-02-19		W	3
2015-02-20		W	18
2015-02-21		W	1
2015-02-23		W	19
2015-02-26		W	8
2015-02-27		W	5
2015-02-28		W	20
2015-03-05		W	4
2015-03-09		W	7
2015-03-10		W	9
2015-03-12		W	20
2015-03-13		W	5
2015-03-14		W	8
2015-03-22		W	8
2015-04-20		W	0
2015-06-09		W	4
2015-06-10		W	7
2015-06-11		W	2
2015-06-12		W	0
2015-06-15		W	0
2015-06-16		W	0
2015-06-17		W	1
