# Supplementary material for: The Furvela tent-trap Mk 1.1 for the collection of outdoor biting mosquitoes
Source: PeerJ. 2017 Nov 15;5:e3848. doi: 10.7717/peerj.3848 (PMC5694212; doi:10.7717/peerj.3848)
Supplement: Supplemental Information 5 [file peerj-05-3848-s005.xlsx]

## Sheet: Dissections
Date	House	Collection	Number	Species	Condition	Virgin	Plug	Null I	Null II	Sac	No-sac	parous rate	Gravid	Dissector			Date	House	Collection	Number	Species	Condition	Virgin	Plug	Null I	Null II	Sac	No-sac	Gravid	Dissector
2008-09-09	222	l	1	Af	All	0	0	0	1	3	2	0.833333	0	Derek			2008-09-09	222	t	2	At	All	0	0	0	0	1	0	0	Derek
2008-09-10	222	l	1	Af	All	1	0	3	1	6	1	0.583333	0	Derek			2008-09-20	222	l	1	marsh	All	0	0	6	0	1	1	0	Derek
2008-09-17	222	l	1	Af	All	0	2	1	0	3	3	0.666667	0	Ant			2008-09-22	3802	t	3	gambiae	Dead	0	0	0	1	0	0	0	Derek
2008-09-21	222	l	1	Af	All	1	0	1	0	4	4	0.8	0	Ant			2008-10-04	24	l		let	All	1	0	10	0	2	5	0	Derek
2008-09-28	222	l	1	Af	Live	1	0	2	0	12	4	0.842105	0	Ayubo			2008-10-06	222	t	2	At	Dead	0	0	0	0	6	4	0	Ayubo
2008-09-29	222	l	1	Af	Live	0	3	0	0	7	4	0.785714	0	Ayubo			2008-10-06	222	t	1	At	Dead	0	0	0	0	3	12	0	Ayubo
2008-09-10	3802	l	1	Af	All	0	1	3	6	0	6	0.375	0	Derek
2008-09-13	3802	l	1	Af	All	4	4	2	3	10	1	0.458333	1	Derek
2008-09-14	3802	l	1	Af	All	6	1	4	1	7	7	0.538462	0	Derek
2008-09-15	3802	l	1	Af	All	0	0	0	0	0	3	1	0	Ant
2008-09-16	3802	l	1	Af	All	0	0	1	1	1	0	0.333333	0	Derek
2008-09-18	3802	l	1	Af	All	1	1	2	0	2	1	0.428571	0	Derek
2008-09-29	3802	l	1	Af	Live	4	9	3	0	5	6	0.407407	0	Derek
2008-09-30	3802	l	1	Af	Live	2	4	6	0	6	7	0.52	0	Derek
2008-10-01	3802	l	1	Af	Live	3	0	0	0	14	10	0.888889	0	Ayubo
2008-10-08	3802	l	1	Af	Dead	4	5	3	1	5	6	0.458333	0	Ayubo
2008-10-10	3802	l	1	Af	Live	4	1	0	0	2	2	0.444444	3	Ayubo
2008-10-12	3802	l	1	Af	Live	5	2	2	0	3	3	0.4	0	Ayubo
2008-09-09	222	l	2	Af	All	0	2	2	0	6	3	0.692308	0	Derek
2008-09-11	222	l	2	Af	All	1	1	0	0	6	5	0.846154	0	Ant
2008-09-14	222	l	2	Af	All	2	0	2	1	2	1	0.375	0	Ant
2008-09-14	222	l	2	Af	All	0	1	0	1	5	5	0.833333	0	Ant
2008-09-17	222	l	2	Af	All	0	0	1	0	0	5	0.833333	0	Ant
2008-09-18	222	l	2	Af	All	0	3	1	0	3	3	0.6	0	Derek
2008-09-28	222	l	2	Af	Live	10	5	1	2	10	6	0.470588	0	Ayubo
2008-09-29	222	l	2	Af	Live	1	3	1	0	1	5	0.545455	0	Ayubo
2008-09-09	3802	l	2	Af	All	1	2	0	1	5	2	0.636364	0	Derek
2008-09-10	3802	l	2	Af	All	1	5	0	1	2	1	0.3	0	Derek
2008-09-10	3802	l	2	Af	All	1	2	2	0	4	5	0.642857	0	Derek
2008-09-11	3802	l	2	Af	All	1	0	2	1	14	4	0.818182	0	Derek
2008-09-12	3802	l	2	Af	Live	0	0	0	1	2	2	0.8	0	Derek
2008-09-12	3802	l	2	Af	Dead	5	7	3	2	9	3	0.413793	0	Derek
2008-09-13	3802	l	2	Af	All	7	6	0	0	10	4	0.518519	0	Derek
2008-09-14	3802	l	2	Af	All	2	0	0	0	2	0	0.5	0	Derek
2008-09-15	3802	l	2	Af	All	1	6	1	1	2	2	0.307692	0	Ant
2008-09-19	3802	l	2	Af	All	0	1	3	0	3	3	0.6	0	Derek
2008-09-21	3802	l	2	Af	All	1	1	0	0	2	3	0.714286	0	Ant
2008-09-26	3802	l	2	Af	All	1	3	3	2	3	4	0.4375	0	Derek
2008-09-28	3802	l	2	Af	Live	7	8	0	0	4	4	0.347826	0	Ayubo
2008-09-30	3802	l	2	Af	Live	6	6	10	0	4	2	0.214286	0	Derek
2008-10-05	3802	l	2	Af	Live	1	1	3	1	3	4	0.538462	1	Ayubo
2008-10-08	3802	l	2	Af	Dead	2	1	0	0	3	7	0.769231	0	Ayubo
2008-10-10	3802	l	2	Af	Live	3	1	2	1	6	9	0.681818	0	Ayubo
2008-10-14	3802	l	2	Af	Live	8	1	0	1	3	3	0.375	0	Ayubo
2008-09-26	3852	l	2	Af	live	1	2	1	0	10	3	0.764706	0	Ayubo
2008-09-10	222	l	3	Af	All	1	3	0	0	0	0	0	0	Derek
2008-09-11	222	l	3	Af	All	1	0	0	0	9	5	0.933333	0	Ant
2008-09-17	222	l	3	Af	All	0	1	0	0	1	2	0.75	0	Ant
2008-09-09	3802	l	3	Af	All	2	4	1	0	4	0	0.363636	0	Derek
2008-09-10	3802	l	3	Af	All	1	1	1	2	1	2	0.375	0	Derek
2008-09-10	3802	l	3	Af	All	2	2	3	0	2	4	0.461538	0	Derek
2008-09-11	3802	l	3	Af	All	1	1	0	3	9	6	0.75	0	Derek
2008-09-12	3802	l	3	Af	Live	11	6	4	2	3	3	0.206897	2	Derek
2008-09-12	3802	l	3	Af	Dead	4	4	5	4	8	5	0.433333	0	Derek
2008-09-13	3802	l	3	Af	All	4	4	1	2	1	3	0.266667	1	Derek
2008-09-14	3802	l	3	Af	All	1	1	0	0	2	3	0.714286	0	Derek
2008-09-15	3802	l	3	Af	All	0	0	0	0	0	2	1	0	Ant
2008-09-16	3802	l	3	Af	All	1	1	0	0	0	2	0.5	0	Derek
2008-09-20	3802	l	3	Af	All	0	6	3	2	5	2	0.388889	0	Derek
2008-09-29	3802	l	3	Af	Live	2	6	3	1	2	5	0.368421	0	Derek
2008-09-30	3802	l	3	Af	Live	3	5	2	0	1	2	0.230769	0	Derek
2008-10-01	3802	l	3	Af	Live	4	0	0	0	0	7	0.636364	0	Ayubo
2008-10-09	3802	l	3	Af	Live	5	4	0	0	6	6	0.571429	0	Ayubo
2008-10-13	3802	l	3	Af	Live	2	2	0	1	4	0	0.444444	0	Ayubo
2008-10-13	3802	l	3	Af	Dead	2	3	2	1	5	2	0.466667	0	Ayubo
2008-10-14	3802	l	3	Af	Live	5	3	5	0	5	3	0.380952	0	Ayubo
2008-09-15	23	l		Af	All	4	6	7	8	13	5	0.418605	0	Derek
2008-09-16	23	l		Af	All	5	7	7	8	11	13	0.470588	0	Derek
2008-09-17	23	l		Af	Live	3	14	1	1	6	17	0.547619	0	Ant
2008-09-17	23	l		Af	Live	3	16	3	0	4	13	0.435897	0	Derek
2008-09-17	23	l		Af	Dead	2	4	3	1	13	9	0.6875	0	Derek
2008-09-18	23	l		Af	Live	4	17	5	4	9	6	0.333333	0	Derek
2008-09-18	23	l		Af	Dead	2	7	5	1	6	6	0.444444	0	Derek
2008-09-19	23	l		Af	Live	1	15	7	2	14	4	0.418605	0	Derek
2008-09-19	23	l		Af	Dead	2	9	5	0	13	3	0.5	0	Derek
2008-09-20	23	l		Af	Live	5	16	3	4	15	6	0.428571	0	Derek
2008-09-20	23	l		Af	Dead	0	10	3	1	7	2	0.391304	0	Derek
2008-09-21	23	l		Af	Live	1	7	2	0	13	6	0.655172	0	Derek	1 pos 2 small
2008-09-21	23	l		Af	Dead	0	10	2	0	6	2	0.4	0	Derek
2008-09-22	23	l		Af	Live	3	12	9	1	16	4	0.444444	0	Derek
2008-09-22	23	l		Af	Dead	3	8	7	3	7	2	0.3	0	Derek
2008-09-23	23	l		Af	Live	0	8	6	2	9	10	0.542857	0	Derek
2008-09-23	23	l		Af	Dead	4	4	3	3	9	5	0.5	0	Derek
2008-09-24	23	l		Af	All	6	10	8	3	8	7	0.357143	0	Derek
2008-09-25	23	l		Af	Live	4	15	7	2	6	10	0.363636	1	Derek
2008-09-25	23	l		Af	Dead	4	8	3	1	5	9	0.466667	0	Derek
2008-09-26	23	l		Af	Live	3	18	7	1	2	10	0.292683	0	Derek
2008-09-26	23	l		Af	Dead	1	5	5	3	4	6	0.416667	0	Derek
2008-09-27	23	l		Af	Live	3	19	11	0	2	7	0.214286	1	Derek
2008-09-27	23	l		Af	Dead	1	4	7	0	0	6	0.333333	0	Derek
2008-09-28	23	l		Af	All	3	15	4	4	1	7	0.235294	0	Derek
2008-10-01	23	l		Af	Live	3	6	2	1	10	5	0.555556	0	Derek
2008-10-02	23	l		Af	Live	2	9	0	0	17	15	0.744186	0	Ayubo
2008-10-02	23	l		Af	Live	3	11	1	0	18	4	0.594595	0	Derek
2008-10-02	23	l		Af	Dead	2	12	2	0	9	8	0.515152	1	Derek
2008-10-03	23	l		Af	All	3	8	1	1	10	12	0.628571	0	Derek
2008-10-04	23	l		Af	Live	1	12	0	3	4	14	0.529412	0	Derek
2008-10-05	23	l		Af	Live	1	17	4	0	14	11	0.531915	0	Derek
2008-10-05	23	l		Af	Dead	0	7	0	4	10	7	0.607143	0	Derek
2008-10-06	23	l		Af	Live	4	11	9	4	9	2	0.282051	0	Derek
2008-10-07	23	l		Af	Live	2	10	2	8	14	9	0.511111	0	Derek
2008-10-08	23	l		Af	Live	0	17	4	3	8	11	0.44186	0	Derek
2008-10-08	23	l		Af	Dead	1	7	5	1	10	4	0.5	0	Derek
2008-10-09	23	l		Af	Live	3	17	10	7	10	2	0.244898	0	Derek
2008-10-10	23	l		Af	Live	1	11	7	2	13	5	0.461538	0	Derek
2008-10-11	23	l		Af	Live	1	6	11	3	3	6	0.3	0	Derek
2008-10-12	23	l		Af	Live	0	5	2	1	5	1	0.428571	0	Derek
2008-10-13	23	l		Af	Live	1	4	1	0	3	4	0.538462	0	Ayubo	Other half dissected by Derek
2008-10-13	23	l		Af	Dead	0	0	0	0	3	1	1	0	Derek
2008-10-13	23	l		Af	Live	4	4	3	0	6	1	0.388889	0	Derek
2008-10-14	23	l		Af	Live	4	10	2	0	9	6	0.483871	0	Ayubo	Other half dissected by Derek
2008-10-14	23	l		Af	Live	3	8	6	3	5	5	0.333333	1	Derek
2008-10-14	23	l		Af	Live	1	0	9	1	1	1	0.153846	0	Derek	19:30:00
2008-10-15	23	l		Af	Live	2	6	4	0	12	8	0.625	0	Derek
2008-10-03	24	l		Af	Live	1	8	6	2	17	10	0.613636	0	Derek
2008-10-04	24	l		Af	Live	1	6	3	2	2	7	0.428571	0	Derek
2008-10-06	24	l		Af	Live	3	14	3	1	8	2	0.322581	0	Derek
2008-10-07	24	l		Af	Live	3	11	8	3	4	5	0.264706	0	Derek
2008-10-09	24	l		Af	Live	1	11	8	2	3	8	0.333333	0	Derek	15:00:00
2008-10-10	24	l		Af	Live	1	11	8	1	8	4	0.363636	0	Derek
2008-10-10	24	l		Af	Live	1	0	5	1	2	7	0.5625	0	Derek	18:00:00
2008-10-11	24	l		Af	Live	1	3	7	1	4	2	0.333333	0	Derek
2008-10-12	24	l		Af	Dead	3	7	1	1	3	3	0.333333	0	Derek
2008-10-12	24	l		Af	Live	3	1	3	1	3	2	0.384615	0	Derek
2008-09-23	3852	l		Af	All	2	5	2	3	7	3	0.454545	0	Derek
2008-10-04	3852	l		Af	Live	1	10	5	0	3	7	0.384615	0	Derek
2008-10-05	3852	l		Af	All	1	13	3	3	6	5	0.354839	0	Derek
2008-10-06	3852	l		Af	All	0	8	4	1	7	7	0.518519	0	Derek
2008-10-08	3852	l		Af	All	1	16	5	1	6	4	0.30303	0	Derek
2008-10-11	3852	l		Af	Live	1	3	6	3	1	3	0.235294	0	Derek
2008-10-12	3852	l		Af	Live	1	5	3	0	2	4	0.4	0	Ayubo
2008-10-13	3852	l		Af	Live	1	6	2	0	6	3	0.5	0	Ayubo	Other half dissected by Derek
2008-10-13	3852	l		Af	Dead	2	2	0	0	11	2	0.764706	0	Ayubo	Dissected at 04:00 pm
2008-10-13	3852	l		Af	Live	2	3	3	2	4	5	0.473684	0	Derek
2008-09-21	222	t	1	Af	All	2	0	0	0	0	2	0.5	0	Ant
2008-09-24	222	t	1	Af	All	0	0	1	1	4	4	0.8	0	Derek
2008-09-27	222	t	1	Af	All	0	2	3	1	2	10	0.666667	0	Derek
2008-09-11	3802	t	1	Af	All	1	0	0	0	5	0	0.833333	0	Derek
2008-09-13	3802	t	1	Af	All	1	3	0	1	10	8	0.782609	0	Derek
2008-09-14	3802	t	1	Af	All	0	1	2	2	1	5	0.545455	0	Derek
2008-09-15	3802	t	1	Af	All	8	3	3	2	0	0	0	0	Derek
2008-09-16	3802	t	1	Af	All	1	0	0	0	3	1	0.8	0	Ant
2008-09-17	3802	t	1	Af	All	1	3	1	0	4	2	0.545455	0	Derek
2008-09-19	3802	t	1	Af	All	3	1	1	1	9	6	0.714286	0	Derek	1 pos 1 small
2008-09-21	3802	t	1	Af	All	0	0	0	0	10	5	1	0	Ant
2008-10-02	3802	t	1	Af	Dead	1	8	0	0	4	1	0.357143	0	Ayubo
2008-09-09	222	t	2	Af	All	0	3	3	0	5	2	0.538462	0	Derek
2008-09-10	222	t	2	Af	All	1	3	2	1	4	2	0.461538	0	Derek
2008-09-29	222	t	2	Af	Live	2	5	3	2	9	5	0.538462	0	Ayubo
2008-10-01	222	t	2	Af	Live	0	1	2	0	1	7	0.727273	0	Ayubo
2008-09-11	3802	t	2	Af	All	2	0	0	1	4	2	0.666667	0	Ant
2008-09-13	3802	t	2	Af	All	1	2	2	2	6	1	0.5	0	Derek
2008-09-14	3802	t	2	Af	All	0	0	0	0	2	0	1	0	Derek
2008-09-15	3802	t	2	Af	All	0	0	0	0	3	2	1	0	Ant
2008-09-17	3802	t	2	Af	All	2	11	2	0	3	1	0.210526	1	Derek
2008-09-19	3802	t	2	Af	All	1	1	1	0	3	5	0.727273	0	Derek
2008-09-21	3802	t	2	Af	All	1	1	0	0	7	4	0.846154	0	Ant
2008-09-26	3802	t	2	Af	Dead	1	8	1	0	2	1	0.230769	0	Ayubo
2008-09-28	3802	t	2	Af	Live	1	18	0	0	11	5	0.457143	0	Ayubo
2008-09-09	222	t	3	Af	All	1	2	2	0	2	0	0.285714	1	Derek
2008-09-16	222	t	3	Af	All	0	2	0	0	0	0	0	0	Ant
2008-09-27	222	t	3	Af	Live	0	3	3	0	15	4	0.76	0	Ayubo
2008-09-12	3802	t	3	Af	Live	0	0	0	2	2	1	0.6	0	Derek
2008-09-12	3802	t	3	Af	Dead	5	1	0	1	2	0	0.222222	0	Derek
2008-09-13	3802	t	3	Af	All	0	1	2	0	0	4	0.571429	0	Derek
2008-09-14	3802	t	3	Af	All	2	1	2	0	3	0	0.375	0	Derek
2008-09-18	3802	t	3	Af	All	1	3	1	0	1	1	0.285714	0	Derek
2008-09-19	3802	t	3	Af	All	0	4	5	0	1	1	0.181818	0	Derek
2008-10-13	3802	t	3	Af	Dead	0	0	3	1	1	2	0.428571	0	Ayubo
2008-09-15	3802	t		Af	All	1	0	0	0	1	2	0.75	0	Ant

## Sheet: moon times
Date	Sunset	Sunrise	Moonrise	Moonset	Moon phase	Weather
2008-09-09	17:30:00	05:42:00	12:04:00	01:26:00	Gibbous
2008-09-10
2008-09-11	17:30:00	05:40:00	13:56:00	02:56:00	almost full
2008-09-12	17:31:00	05:39:00	14:53:00	03:36:00
2008-09-13	17:31:00	05:38:00	15:50:00	04:12:00
2008-09-14	17:31:00	05:37:00	16:47:00	04:47:00
2008-09-15	17:32:00	05:36:00	17:44:00	05:21:00	FULL	clear cold
2008-09-16	17:32:00	05:35:00	18:43:00	05:56:00		clear
2008-09-17	17:32:00	05:34:00	19:45:00	06:32:00
2008-09-18	17:33:00	05:33:00	20:49:00	07:12:00
2008-09-19	17:33:00	05:32:00	21:55:00	07:57:00
2008-09-20	17:33:00	05:31:00	23:02:00	08:48:00
2008-09-21	17:34:00	05:30:00	00:06:00	09:45:00	HALF MOON
2008-09-22	17:34:00	05:28:00	01:05:00	10:48:00
2008-09-23	17:34:00	05:27:00	02:01:00	12:59:00
2008-09-24	17:35:00	05:26:00	02:43:00	14:02:00
2008-09-25	17:35:00	05:25:00	03:22:00	15:02:00
2008-09-26	17:35:00	05:25:00	03:59:00	16:00:00		cloudy windy
2008-09-27	17:36:00	05:24:00	04:32:00	17:36:00	NO MOON	Cloudy windy
2008-09-28	17:36:00	05:23:00	05:05:00	17:50:00
2008-09-29	17:36:00	05:22:00	05:38:00	18:45:00
2008-09-30	17:37:00	05:19:00	06:13:00	19:41:00
2008-10-01	17:37:00	05:18:00	06:13:00	19:41:00		cloudy
2008-10-02			06:50:00	20:36:00		clear
2008-10-03			07:30:00	21:31:00		cloudy
2008-10-04			08:15:00	22:25:00		clear
2008-10-05			09:03:00	23:17:00	HALF MOON	cloudy windy
2008-10-06			09:55:00	00:05:00		clear windy
2008-10-07			10:49:00	00:00:00		clear
2008-10-08			11:49:00	00:50:00		clear
2008-10-09			12:40:00	01:30:00		clear
2008-10-10			13:36:00	02:08:00		clear
2008-10-11	17:41:00	05:09:00	14:32:00	02:43:00		partialy untill 09:30
2008-10-12			15:29:00	03:17:00		clear
2008-10-13	17:42:00	05:08:00	16:29:00	03:17:00		clear
2008-10-14			16:27:00	03:51:00		partialy clean and calm
2008-10-15			18:34:00	05:06:00	FULL	clear

## Sheet: light tent comparison
Date	House	Collection	Time	live A funestus	Dead A funestus	A funestus total female	A funestus male	A marshalii	Mansonia sp	Mans africana	Ms africana male	Ms unfiformis	Ms unformis male	Ms sp male	A tenebrosus	Cx sp	Sp A	A gambiae sl
2008-09-16	23	light		0	0	109	0	1	0	12		0		0	0	0	0	0
2008-09-17	23	light		58	303	361	0	0	0	2		14		0	3	2	0	0
2008-09-19	23	light		96	197	293	1	1	0	1		4		0	1	1	0	0
2008-09-20	23	light		229	36	265	4	0	0	22		3		1	1	0	0	0
2008-09-21	23	light		31	54	85	1	0	0	6		2		0	1	0	0	0
2008-09-22	23	light		95	239	334	0	0	0	2		0		0	6	0	0	0
2008-09-23	23	light		0	0	131	5	0	0	9		0		0	4	0	1	0
2008-09-24	23	light		0	0	53	1	0	0	27		9		1	5	0	0	0
2008-09-25	23	light		92	93	185	0	4	0	35		14		2	1	0	0	0
2008-09-26	23	light		81	95	176	26	15	0	33		4		0	5	0	0	1
2008-09-27	23	light		59	64	123	28	2	0	7		14		0	0	0	0	0
2008-09-28	23	light		55	192	247	27	1	0	33		0	2	0	0	2	0	0
	House	Collection	Period	Af	Af male	letabensis	africana	uniformis	An tenebrosus
	222	light	18-22	18.6154	1.38462	2.30769	5.84615	1.23077	1.15385
	222	light	22-02	17.7692	0.307692	16.9231	2.30769	0.230769	1.30769
	222	light	22-06	7.1	0.3	0.3	2	0.8	0.2
	222	tent	18-22	3.5	0	1.07143	23.3571	6	1.42857
	222	tent	22-02	7.3125	0	0.75	21.5625	7.4375	1.0625
	222	tent	22-06	3.71429	0.142857	0	15.0714	7.71429	1.21429
	3802	light	18-22	44.9286	7.85714	3.5	4.64286	0.428571	2.07143
	3802	light	22-02	31.1176	2.88235	1.11765	4.76471	1.05882	1.52941
	3802	light	22-06	20.8333	2.41667	0.5	7.91667	1.75	1.5
	3802	tent	18-22	15.6154	2.92308	0.153846	8.46154	0.769231	1.69231
	3802	tent	22-02	13.8	0.133333	0.533333	17	2.4	1.46667
	3802	tent	22-06	10.9231	1.30769	0.769231	11.4615	6.23077	0.923077
		Period	Collection	Af light	Af male	letabensis	africana light	uniformis	At light			Af tent	Af male	letabensis	africana tent	uniformis tent	At tent
		18-22	light	63.544	9.24176	5.80769	10.489	1.65934	3.22527	1	tent	19.1154	2.92308	1.22527	31.8187	6.76923	3.12088
		22-02	light	48.8869	3.19005	18.0407	7.0724	1.28959	2.8371	2	tent	21.1125	0.133333	1.28333	38.5625	9.8375	2.52917
		22-06	light	27.9333	2.71667	0.8	9.91667	2.55	1.7	3	tent	14.6374	1.45055	0.769231	26.533	13.9451	2.13736
	Period
	18-22	18.6154	3.5	44.9286	15.6154
	22-02	17.7692	7.3125	31.1176	13.8
	22-06	7.1	3.71429	20.8333	10.9231
		letabensis
		light	tent
		5.80769	1.22527
		18.0407	1.28333
		0.8	0.769231

## Sheet: funestus age by period etc
	Time	Collection	Af light	Af male	letabensis light	africana light	uniformis light	At light			Af tent	Af tent male	letabensis tent	africana tent	uniformis tent	At tent		Af light	Af tent
	18-22	light	63.544	9.24176	5.80769	10.489	1.65934	3.22527	1	tent	19.1154	2.92308	1.22527	31.8187	6.76923	3.12088		63.544	19.1154
	22-02	light	48.8869	3.19005	18.0407	7.0724	1.28959	2.8371	2	tent	21.1125	0.133333	1.28333	38.5625	9.8375	2.52917		48.8869	21.1125
	22-06	light	27.9333	2.71667	0.8	9.91667	2.55	1.7	3	tent	14.6374	1.45055	0.769231	26.533	13.9451	2.13736		27.9333	14.6374
	Time	Collection	Af light	Af male	letabensis	africana light	uniformis	At light	Af tent	Af tent male	letabensis tent	africana tent	uniformis tent	At tent
	18-22	light	0.452708	0.610079	0.235621	0.381723	0.301757	0.415501	0.348406	0.64857	0.373806	0.328318	0.221566	0.40076
	22-02	light	0.348286	0.210585	0.731922	0.257383	0.234517	0.365494	0.384806	0.0295839	0.391518	0.397904	0.321994	0.324776
	22-06	light	0.199006	0.179336	0.0324564	0.360894	0.463726	0.219005	0.266788	0.321847	0.234676	0.273778	0.45644	0.274464
			1	1	1	1	1	1	1	1	1	1	1	1
													africana light	africana tent	africana light	africana tent
													0.381723	0.328318	10.489	31.8187
													0.257383	0.397904	7.0724	38.5625
													0.360894	0.273778	9.91667	26.533
													uniformis light	uniformis tent							virgin	plug	Ni	NII	sac	no-sac	Parous rate
													1.65934	6.76923						1	18	21	11	8	52	44	0.623377
													1.28959	9.8375						2	12	53	16	6	60	37	0.527174
													2.55	13.9451						3	9	17	18	4	27	13	0.454545
																				Average
																				18-22	1.5	1.75	0.916667	0.666667	4.33333	3.66667	0.623377
																				22-02	0.923077	4.07692	1.23077	0.461538	4.61538	2.84615	0.527174
																				22-06	0.9	1.7	1.8	0.4	2.7	1.3	0.454545
																				Std Dev
																				18-22	2.23607	2.34036	1.1645	0.778499	3.60135	3.22866	0.264628	0.888005
																				22-02	0.759555	5.34574	1.16575	0.77625	2.93083	2.11527	0.251954	0.779128
																				22-06	1.59513	1.33749	1.61933	0.699206	4.42342	1.56702	0.225432	0.679978

## Sheet: Collections
Date	House	Collection	Time	live Af	Dead Af	Af tot fem	Af male	marsh	Mansonia	Mans afr	afr male	Ms unf	unf male	Ms male	An t	Cx	Sp A	gambiae	letabensis	Ruphipes	Other	Obs
2008-09-09	222	l	1	0	0	13	0	0	3	0	0	0	0	0	0	0	0	0	0	0
2008-09-09	222	l	2	0	0	15	0	0	0	0	0	0	0	0	0	1	0	0	0	0
2008-09-09	222	l	3	0	0	11	0	0	63	0	0	0	0	43	0	3	0	0	6	0
2008-09-09	222	t	2	0	0	14	0	0	3	0	0	0	0	0	0	0	0	0	0	0
2008-09-09	222	t	3	0	0	8	0	0	0	0	0	0	0	0	1	0	0	0	0	0
2008-09-09	222	t	1	0	0	3	0	0	31	0	0	0	0	0	0	0	0	0	3	0	1 Aedes
2008-09-09	222	t	2	0	0	17	0	0	84	0	0	0	0	10	2	0	0	0	2	0
2008-09-09	222	t	3	0	0	6	1	0	7	0	0	0	0	0	0	0	0	0	2	0
2008-09-09	3802	l	1	0	0	8	3	0	2	0	0	0	0	0	0	0	0	0	0	0
2008-09-09	3802	l	2	0	0	18	1	0	8	0	0	0	0	0	1	0	0	0	0	0
2008-09-09	3802	l	3	0	0	12	1	0	13	0	0	0	0	1	0	0	0	0	0	0
2008-09-09	3802	t	1	0	0	0	0	0	18	0	0	0	0	18	4	0	0	0	0	0
2008-09-09	3802	t	2	0	0	12	0	0	55	0	0	0	0	5	2	0	0	0	0	0
2008-09-09	3802	t	3	0	0	16	1	0	45	0	0	0	0	9	5	0	0	0	0	0
2008-09-11	222	l	1	0	0	0	0	0	0	0	0	0	0	0	0	0	0	0	0	0
2008-09-11	222	l	2	0	0	26	0	0	0	0	0	0	0	0	0	0	0	0	0	0
2008-09-11	222	l	3	0	0	14	1	0	0	0	0	0	0	0	1	0	0	0	0	0
2008-09-11	222	t	1	0	0	0	0	0	75	0	0	0	0	2	1	0	0	0	0	0
2008-09-11	222	t	2	0	0	0	0	0	11	1	0	0	0	0	0	0	0	0	0	0
2008-09-11	222	t	3	0	0	3	0	0	89	0	0	0	0	3	9	1	0	0	0	0
2008-09-11	3802	l	1	0	0	55	1	32	17	0	0	0	0	0	3	1	0	0	0	0
2008-09-11	3802	l	2	0	0	29	0	0	4	0	0	0	0	0	3	1	0	0	0	0
2008-09-11	3802	t	1	0	0	13	0	1	46	0	0	0	0	1	1	0	0	0	0	0
2008-09-11	3802	t	2	0	0	15	1	0	25	0	0	0	0	1	0	0	0	0	0	0
2008-09-12	222	t	1	0	0	1	0	0	8	0	0	0	0	0	2	0	0	0	0	0
2008-09-12	222	t	2	0	0	3	0	1	42	0	0	0	0	0	2	0	0	0	0	0
2008-09-12	222	t	3	0	0	0	0	0	56	0	0	0	0	1	5	0	4	0	0	0
2008-09-12	3802	l	1	0	0	120	1	3	1	0	0	0	0	0	3	0	0	0	0	1
2008-09-12	3802	l	2	0	0	123	5	10	0	0	0	0	0	0	0	1	0	1	0	0
2008-09-12	3802	l	3	0	0	81	11	0	6	0	0	0	0	0	0	0	0	0	0	0
2008-09-12	3802	t	1	0	0	24	1	0	11	0	0	0	0	0	1	0	1	0	0	0
2008-09-12	3802	t	2	0	0	47	0	0	56	0	0	0	0	4	5	0	1	0	0	0
2008-09-12	3802	t	3	0	0	15	2	0	43	0	0	0	0	2	1	0	0	0	0	0
2008-09-13	222	l	1	0	0	39	6	4	0	1	0	1	0	1	1	0	0	1	0	0
2008-09-13	222	l	2	0	0	15	1	0	0	0	0	0	0	0	0	0	0	0	0	0
2008-09-13	222	l	3	0	0	9	0	0	0	1	0	0	0	0	0	0	0	0	0	0
2008-09-13	222	t	1	0	0	1	0	0	13	0	0	0	0	2	0	0	0	0	0	0
2008-09-13	222	t	2	0	0	2	0	0	0	1	0	10	0	2	0	0	0	0	0	0
2008-09-13	222	t	3	0	0	0	0	0	0	11	0	22	0	0	0	0	1	0	0	0
2008-09-13	3802	l	1	0	0	100	17	0	2	0	0	0	0	0	1	1	2	0	0	0
2008-09-13	3802	l	2	0	0	38	8	0	0	0	0	0	0	0	0	1	0	0	0	0
2008-09-13	3802	l	3	0	0	17	2	0	0	0	0	0	0	0	1	0	0	0	0	0
2008-09-13	3802	t	1	0	0	33	1	0	5	0	0	0	0	0	0	0	0	0	0	0
2008-09-13	3802	t	2	0	0	17	1	0	0	16	0	0	0	2	0	1	0	0	0	0
2008-09-13	3802	t	3	0	0	7	2	0	0	6	0	3	0	1	0	1	0	0	0	0
2008-09-14	222	l	1	0	0	20	1	2	3	0	0	0	0	0	1	2	0	0	0	0
2008-09-14	222	l	2	0	0	9	0	0	0	0	0	0	0	0	1	0	0	0	0	0
2008-09-14	222	t	1	0	0	0	0	1	11	0	0	0	0	0	0	0	0	0	0	0
2008-09-14	222	t	2	0	0	0	0	0	19	0	0	0	0	0	0	1	0	0	0	0
2008-09-14	222	t	3	0	0	0	0	0	13	0	0	0	0	0	0	0	0	0	0	0
2008-09-14	3802	l	1	0	0	59	31	0	3	0	0	0	0	0	1	0	0	0	0	0
2008-09-14	3802	l	2	0	0	5	2	0	0	0	0	0	0	0	1	0	0	0	0	0
2008-09-14	3802	l	3	0	0	10	1	0	0	0	0	0	0	0	1	0	0	0	0	0
2008-09-14	3802	t	1	0	0	12	0	0	0	6	0	6	0	4	0	1	1	0	0	0
2008-09-14	3802	t	2	0	0	2	0	0	0	0	0	2	0	0	0	0	0	0	0	0
2008-09-14	3802	t	3	0	0	8	0	0	0	8	0	1	0	0	3	0	0	0	0	0
2008-09-15	222	l	1	0	0	5	2	0	1	0	0	0	0	0	1	0	0	0	0	0
2008-09-15	222	l	2	0	0	5	1	0	0	0	0	0	0	0	1	0	0	0	0	0
2008-09-15	222	l	3	0	0	1	0	0	0	0	0	0	0	0	1	0	0	0	0	0
2008-09-15	222	t	1	0	0	0	0	0	0	14	0	0	0	3	0	0	0	0	0	0
2008-09-15	222	t	2	0	0	2	0	1	0	5	0	1	0	1	0	1	0	0	0	0
2008-09-15	222	t	3	0	0	0	0	0	0	6	0	0	0	0	0	0	0	0	0	0
2008-09-15	3802	l	1	0	0	3	0	0	0	15	0	0	0	8	2	3	0	0	0	0
2008-09-15	3802	l	2	0	0	16	0	0	0	7	0	2	0	2	1	2	0	0	0	0
2008-09-15	3802	l	3	0	0	2	1	0	0	2	0	0	0	0	0	2	0	0	0	0
2008-09-15	3802	t	1	0	0	33	26	0	0	3	0	0	0	0	2	3	0	0	0	0
2008-09-15	3802	t	2	0	0	11	0	0	0	0	0	0	0	0	0	0	0	0	0	0
2008-09-15	3802	t	3	0	0	6	2	0	0	0	0	0	0	0	0	0	0	0	0	0
2008-09-16	23	l		0	0	109	0	1	0	12	0	0	0	0	0	0	0	0	0	0
2008-09-16	222	l	1	0	0	6	0	2	0	14	0	0	0	2	0	4	0	0	0	0
2008-09-16	222	l	3	0	0	9	1	0	2	0	0	0	0	0	0	1	0	0	0	0		could be l 3
2008-09-16	222	l	2	0	0	0	0	0	0	0	0	0	0	0	0	0	0	0	0	0		coulsd be l 2
2008-09-16	222	t	1	0	0	0	0	0	0	37	0	0	0	4	1	0	0	0	0	0
2008-09-16	222	t	2	0	0	0	0	0	0	35	0	4	0	5	1	1	0	1	0	0
2008-09-16	222	t	3	0	0	2	0	0	0	61	0	0	0	38	1	1	0	0	0	0
2008-09-16	3802	l	2	0	0	4	1	0	0	18	0	0	0	8	2	3	0	0	0	0
2008-09-16	3802	l	3	0	0	6	2	0	0	43	0	0	0	11	2	0	0	0	0	0
2008-09-16	3802	t	1	0	0	5	2	1	0	0	0	0	0	0	2	1	0	0	0	0
2008-09-16	3802	t	2	0	0	14	0	2	0	3	0	0	0	0	4	2	0	0	0	0
2008-09-16	3802	t	3	0	0	10	0	0	0	0	0	0	0	0	0	2	0	0	0	0
2008-09-17	23	l		58	303	361	0	0	0	2	0	14	0	0	3	2	0	0	0	0
2008-09-17	222	l	1	0	0	20	1	8	24	0	0	0	0	0	4	0	0	0	0	0
2008-09-17	222	l	2	0	0	14	1	0	0	1	0	0	0	0	0	1	0	0	0	0
2008-09-17	222	l	3	0	0	8	1	0	0	0	0	0	0	0	0	0	0	0	0	0
2008-09-17	222	t	1	0	0	2	0	0	39	0	0	0	0	0	0	3	0	0	0	0
2008-09-17	222	t	2	0	0	0	0	0	0	11	0	0	0	0	0	0	0	0	0	0	1 aedes
2008-09-17	222	t	3	0	0	4	0	0	0	34	0	0	0	2	1	1	0	0	0	0
2008-09-17	3802	l	1	0	0	36	7	2	0	6	0	0	0	0	2	6	0	0	0	0
2008-09-17	3802	l	2	0	0	16	1	0	0	0	0	0	0	0	1	1	0	0	0	0
2008-09-17	3802	l	3	0	0	13	4	0	0	1	0	0	0	0	0	0	0	0	0	0
2008-09-17	3802	t	1	0	0	3	0	0	0	32	0	0	0	2	2	0	0	0	0	0
2008-09-17	3802	t	2	0	0	16	0	0	0	34	0	2	0	0	0	2	0	0	0	0
2008-09-17	3802	t	3	22	3	25	0	0	0	17	0	5	0	1	1	3	0	0	0	0
2008-09-18	222	l	2	0	0	0	0	4	0	0	0	0	0	0	2	0	0	1	0	0
2008-09-18	222	l	2	0	0	47	0	215	0	16	0	0	0	3	12	0	0	0	0	0
2008-09-18	222	l	3	0	0	11	0	0	0	1	0	0	0	0	0	0	0	0	0	0
2008-09-18	222	t	1	0	0	0	0	1	0	26	0	0	0	3	1	0	0	0	0	0
2008-09-18	222	t	2	0	0	1	0	0	0	7	0	1	0	0	0	1	0	0	0	0
2008-09-18	222	t	3	0	0	0	0	0	0	4	0	0	0	0	0	0	0	0	0	0
2008-09-18	3802	l	1	0	0	8	1	0	0	1	0	0	0	0	0	0	0	0	0	0
2008-09-18	3802	l	2	0	0	12	2	4	0	5	0	0	0	0	1	0	0	0	0	0
2008-09-18	3802	l	3	0	0	7	0	0	0	0	0	0	0	0	0	0	0	0	0	0
2008-09-18	3802	t	1	0	0	6	1	0	0	33	0	0	0	4	1	1	0	0	0	0
2008-09-18	3802	t	2	0	0	2	0	0	0	29	0	0	0	2	0	6	0	0	0	0
2008-09-19	23	l		96	197	293	1	1	0	1	0	4	0	0	1	1	0	0	0	0
2008-09-19	222	l	1	0	0	31	2	1	0	2	0	0	0	0	0	3	0	0	0	0
2008-09-19	222	l	2	0	0	20	0	0	0	0	0	0	0	2	0	0	0	0	0	0
2008-09-19	222	l	3	0	0	6	1	0	0	1	0	0	0	0	0	0	0	0	0	0	1 culex male
2008-09-19	222	t	1	0	0	0	0	0	0	33	0	4	0	2	0	0	0	0	0	0
2008-09-19	222	t	2	0	0	1	0	0	0	0	0	8	0	0	0	0	1	0	0	0
2008-09-19	222	t	3	0	0	0	1	0	0	2	0	6	0	0	0	0	0	0	0	0
2008-09-19	3802	l	2	0	0	14	1	0	0	1	0	0	0	0	0	5	0	0	0	0
2008-09-19	3802	t	1	0	0	26	4	0	0	0	0	1	0	0	2	0	0	0	0	0
2008-09-19	3802	t	1	0	0	3	1	0	53	0	0	0	0	7	0	0	0	0	0	0
2008-09-19	3802	t	2	0	0	11	0	1	54	0	0	0	0	8	4	0	1	0	0	0
2008-09-19	3802	t	3	0	0	19	1	0	0	14	0	2	0	0	1	3	0	0	0	0
2008-09-20	23	l		229	36	265	4	0	0	22	0	3	0	1	1	0	0	0	0	0
2008-09-20	222	l	1	0	0	50	5	8	0	23	0	0	0	2	2	0	0	0	0	0
2008-09-20	222	l	3	0	0	6	0	0	0	1	0	0	0	0	0	1	0	0	0	0
2008-09-20	222	l	2	0	0	35	1	0	10	0	0	0	0	0	2	0	1	0	0	0
2008-09-20	222	t	1	0	0	4	0	1	0	21	0	0	0	4	0	0	0	0	0	0
2008-09-20	222	t	2	0	0	11	0	0	55	0	0	0	0	11	1	0	9	0	0	0
2008-09-20	222	t	3	0	0	2	0	0	81	0	0	0	0	2	0	0	0	0	0	0
2008-09-20	3802	l	1	0	0	51	3	0	0	9	0	0	0	1	6	5	0	0	0	0
2008-09-20	3802	l	2	0	0	65	11	0	0	34	0	0	0	0	15	2	2	0	0	0
2008-09-20	3802	l	3	0	0	44	2	0	0	2	0	0	0	2	1	0	0	0	0	0
2008-09-20	3802	t	3	0	0	10	0	0	0	34	0	6	0	0	2	0	2	0	0	0
2008-09-21	23	l		31	54	85	1	0	0	6	0	2	0	0	1	0	0	0	0	0
2008-09-21	222	l	1	0	0	21	2	2	0	3	0	0	0	1	1	0	0	0	0	0
2008-09-21	222	l	2	0	0	33	0	1	0	7	0	0	0	1	1	0	0	0	0	0
2008-09-21	222	l	3	0	0	9	0	0	0	0	0	0	0	0	0	0	0	0	0	0
2008-09-21	222	t	1	0	0	4	0	0	0	76	0	0	0	1	1	0	0	0	0	0
2008-09-21	222	t	2	0	0	2	0	0	0	54	0	0	0	7	3	4	0	0	0	0
2008-09-21	222	t	3	0	0	0	1	0	0	9	0	0	0	1	0	2	0	0	0	0
2008-09-21	3802	l	1	0	0	42	4	0	0	4	0	0	0	0	0	0	0	0	0	0
2008-09-21	3802	l	2	0	0	28	2	1	0	7	0	0	0	0	0	1	0	0	0	0
2008-09-21	3802	t	1	0	0	28	0	0	0	27	0	0	0	0	1	0	0	0	0	0
2008-09-21	3802	t	2	0	0	33	0	0	0	34	0	0	0	1	2	0	0	0	0	0
2008-09-22	23	l		95	239	334	0	0	0	2	0	0	0	0	6	0	0	0	0	0
2008-09-22	222	l	1	0	0	22	0	3	0	3	0	0	0	1	1	1	0	0	0	0
2008-09-22	222	l	2	0	0	1	0	0	0	0	0	0	0	0	0	0	0	0	0	0	1 culex male
2008-09-22	222	l	3	0	0	8	0	1	0	0	0	0	0	0	0	0	0	0	0	0
2008-09-22	3802	l	1	0	0	45	16	6	0	2	0	0	0	0	1	1	0	0	0	0
2008-09-22	3802	l	2	0	0	5	2	0	0	0	0	0	0	0	0	0	0	0	0	0
2008-09-22	3802	l	3	0	0	3	0	0	0	0	0	0	0	0	0	0	0	0	0	0
2008-09-22	3802	t	1	0	0	10	0	0	0	3	0	2	0	0	1	0	0	0	0	0
2008-09-22	3802	t	2	0	0	16	0	0	0	6	0	3	0	0	3	0	0	0	0	0
2008-09-22	3802	t	3	0	0	2	0	0	0	1	0	0	0	0	0	0	0	1	0	0
2008-09-23	23	l		0	0	131	5	0	0	9	0	0	0	0	4	0	1	0	0	0
2008-09-23	23	t	1	0	0	1	0	0	0	4	0	11	0	2	0	0	1	0	0	0
2008-09-23	23	t	2	0	0	1	0	0	0	10	0	0	0	0	1	0	0	0	0	0
2008-09-23	23	t	3	0	0	4	0	0	0	12	0	2	0	0	0	0	0	0	0	0
2008-09-23	222	l	1	0	0	10	0	0	0	4	0	0	0	0	2	0	1	0	0	0
2008-09-23	3802	l	1	0	0	12	2	2	0	4	0	0	0	0	1	2	0	0	0	0
2008-09-23	3802	l	2	0	0	10	0	0	0	3	0	0	0	0	0	0	1	0	0	0
2008-09-23	3802	l	3	0	0	14	0	0	0	2	0	0	0	0	0	0	0	0	0	0
2008-09-23	3802	t	2	0	0	1	0	1	0	54	0	2	0	2	0	0	0	0	0	0
2008-09-23	3802	t	3	0	0	1	1	0	0	52	0	0	0	5	0	1	0	1	0	0
2008-09-23	3852	l		0	0	1	1	0	0	1	0	1	0	0	0	0	0	0	0	0
2008-09-24	23	l		0	0	4	1	0	0	27	0	9	0	1	5	0	0	0	0	0
2008-09-24	23	t	3	0	0	11	0	0	0	12	0	25	4	0	0	0	0	0	4	0		trap on late
2008-09-24	23	t	1	0	0	11	0	0	0	64	0	27	0	0	1	0	1	0	7	0
2008-09-24	23	t	2	0	0	26	0	0	0	32	0	29	6	0	7	1	1	0	0	0
2008-09-24	222	l	3	0	0	7	0	0	0	3	0	2	0	0	0	0	0	0	0	0
2008-09-24	222	l	2	0	0	9	0	0	0	6	0	14	0	0	1	0	2	0	0	0
2008-09-24	222	l	1	0	0	10	0	0	0	2	0	11	0	0	0	0	0	0	0	0
2008-09-24	222	t	1	0	0	11	0	0	0	27	0	61	0	2	7	0	1	0	0	0
2008-09-24	222	t	2	0	0	26	0	1	0	29	0	32	0	6	7	1	0	0	0	0
2008-09-24	222	t	3	0	0	11	0	0	0	25	0	12	0	5	0	0	0	0	0	0
2008-09-24	3802	l	3	0	0	20	1	0	0	44	0	19	0	4	14	0	0	0	0	0
2008-09-24	3802	l	2	0	0	7	0	0	0	6	0	4	1	0	0	0	2	0	0	0
2008-09-24	3802	t	1	0	0	7	2	0	0	6	0	1	0	1	1	1	0	0	0	0
2008-09-24	3802	t	2	0	0	0	0	4	0	52	0	2	0	3	0	0	0	0	0	0
2008-09-24	3802	t	3	0	0	2	0	7	0	7	0	42	0	3	1	0	0	0	0	0
2008-09-24	3852	l	1	0	0	4	0	0	0	0	0	4	0	0	0	0	0	0	0	0
2008-09-24	3852	l	2	0	0	10	0	0	0	0	0	2	0	0	0	0	0	0	0	0
2008-09-24	3852	l	3	0	0	16	0	0	0	0	0	3	0	0	0	0	0	0	0	0
2008-09-25	23	l		92	93	185	0	4	0	35	0	14	0	2	1	0	0	0	0	0
2008-09-25	222	l	1	0	0	4	1	0	0	16	0	11	0	1	1	0	0	0	0	0
2008-09-25	222	l	2	0	0	3	0	0	0	5	0	3	0	0	0	2	0	0	0	0
2008-09-25	222	l	3	0	0	4	0	1	0	9	0	5	0	0	1	1	0	0	0	0
2008-09-25	222	t	1	0	0	3	0	9	0	35	0	8	0	0	2	0	1	0	0	0
2008-09-25	222	t	2	0	0	10	0	0	0	49	0	10	0	0	1	0	0	0	0	0
2008-09-25	222	t	3	0	0	22	0	0	0	59	0	68	0	11	0	0	0	0	0	0
2008-09-25	222	t	2	0	0	10	1	0	0	10	0	49	0	0	1	0	0	0	0	0
2008-09-25	222	t	1	0	0	4	1	0	9	28	0	35	0	0	2	0	1	0	0	0
2008-09-25	3802	l	1	0	0	53	4	1	0	14	0	6	0	0	1	0	0	0	0	0
2008-09-25	3802	l	2	0	0	1	0	0	0	1	0	3	0	0	0	0	0	0	0	0
2008-09-25	3802	l	3	0	0	33	5	6	0	1	0	2	0	0	1	0	0	0	0	0
2008-09-25	3802	t	2	0	0	0	0	0	0	0	0	12	0	0	0	0	0	0	0	0
2008-09-25	3802	t	3	0	0	28	9	3	0	10	0	22	0	15	3	0	0	0	0	0
2008-09-25	3852	l	1	0	0	1	1	0	0	0	0	1	0	0	0	0	0	0	0	0
2008-09-25	3852	l	3	0	0	8	0	0	0	0	0	1	0	0	0	0	0	0	0	0
2008-09-26	23	l		81	95	176	26	15	0	33	0	4	0	0	5	0	0	1	0	0
2008-09-26	222	l	1	0	0	6	0	0	0	10	0	4	0	0	2	1	0	0	0	0
2008-09-26	222	l	3	0	0	2	0	1	0	8	0	3	2	0	0	2	0	0	0	0
2008-09-26	222	l	2	0	0	4	0	0	0	6	0	0	0	0	1	0	1	0	0	0
2008-09-26	222	t	2	0	0	21	0	5	0	102	0	27	0	3	1	0	0	0	0	0
2008-09-26	222	t	1	0	0	6	1	0	0	73	0	26	11	0	2	0	0	0	0	0
2008-09-26	222	t	2	0	0	0	0	0	0	56	0	11	1	0	2	0			5	0
2008-09-26	3802	l	1	0	0	4	0	0	0	0	1	0	0	0	0	0	0	0	0	0
2008-09-26	3802	l	2	0	0	31	3	0	0	0	0	0	0	0	0	0	0	0	0	0
2008-09-26	3802	l	3	0	0	25	4	0	0	0	0	2	3	0	3	0	0	0	0	0
2008-09-26	3802	t	2	0	0	19	0	0	0	27	0	13	10	0	3	0	0	0	0	0
2008-09-26	3802	t	3	0	0	38	2	1	0	0	0	6	1	0	0	4	0	0	0	0
2008-09-26	3852	l	2	0	0	30	0	0	0	0	0	3	0	0	0	0	0	1	0	0
2008-09-26	3852	l	3	0	0	22	0	0	0	0	0	0	0	0	0	0	0	0	0	0
2008-09-26	3852	l	1	0	0	7	0	0	0	0	0	1	0	0	0	0	0	0	0	0
2008-09-26	3802	t	1	0	0	0	0	0	0	5	0	4	1	0	0	0	0	0	0	0
2008-09-27	23	l		59	64	59	28	2	0	7	0	14	0	0	0	0	0	0	0	0
2008-09-27	222	l	1	0	0	16	1	0	0	5	0	3	2	0	2	0	0	0	0	0
2008-09-27	222	l	2	0	0	14	0	0	0	15	0	28	0	0	1	0	0	0	0	0
2008-09-27	222	l	3	0	0	24	0	0	0	26	0	0	0	0	1	0	0	0	2	0
2008-09-27	222	t	1	0	0	23	0	3	0	58	0	11	1	0	4	0	0	3	0	0
2008-09-27	222	t	2	0	0	24	0	4	0	51	0	26	2	0	1	0	0	1	0	0
2008-09-27	222	t	3	0	0	26	0	0	0	44	0	43	0	0	2	1	0	0	0	0
2008-09-27	3802	l	1	0	0	41	23	3	0	10	0	0	1	0	2	0	0	0	0	0
2008-09-27	3802	l	2	0	0	72	4	3	0	2	0	8	1	0	1	1	0	0	0	0
2008-09-27	3802	l	2	0	0	60	7	1	0	3	0	5	0	0	2	0	0	0	0	0
2008-09-27	3802	t	2	0	0	5	1	0	0	11	0	7	1	0	2	0	0	0	0	0
2008-09-27	3802	t	1	0	0	1	1	0	0	4	0	5	0	0	0	0	0	0	0	0
2008-09-27	3802	t	3	0	0	16	0	0	0	15	0	10	0	0	0	0	0	0	0	0
2008-09-27	3852	l	2	0	0	5	0	0	0	0	0	0	0	0	0	0	0	0	0	0
2008-09-27	3852	l	3	0	0	4	0	0	0	0	0	0	0	0	0	0	0	0	0	0
2008-09-27	3852	l	1	0	0	4	2	0	0	0	0	0	0	0	0	0	0	0	0	0
2008-09-28	23	l		55	192	247	27	1	0	33	0	0	2	0	0	2	0	0	1	0
2008-09-28	222	l	1	0	0	21	1	0	0	1	0	1	0	0	0	1	0	0	0	1		battery stolen early morning
2008-09-28	222	l	2	27	27	27	0	6	0	12	0	20	0	0	3	4	0	0	0	0
2008-09-28	222	l	3	25	0	25	1	10	0	6	0	5	0	0	8	0	5	0	0	0
2008-09-28	3802	t	2			110	3	1	0	7	0	54	0	0	4	0	0	1	0	0
2008-09-28	3802	t	1			11	1	3	0	5	2	0	0	0	0	0	0	1	0	0
2008-09-28	3802	t	3			64	0	0	0	25	0	11	1	0	3	0	0	0	0	0
2008-09-28	3802	l	3			34	3	0	0	0	0	3	0	0	1	0	1	0	0	0
2008-09-28	3802	l	1			136	24	20	0	0	0	4	0	0	5	0	1	0	0	0		formigas
2008-09-28	3852	l	1			2	0	0	0	1	0	0	0	0	0	0	0	0	0	0
2008-09-28	3852	l	2			12	0	0	0	0	0	0	0	0	0	0	0	0	0	0
2008-09-28	3852	l	3			17	0	0	0	0	0	0	0	0	0	0	0	0	0	0
2008-09-28	222	t	2			34	1	1	0	29	0	37	3	0	1	0	3	0	0	0
2008-09-28	222	t	3			41	1	3	0	22	1	57	4	0	9	1	0	0	0	0
2008-09-29	222	l	1			14	0	1	0	0	0	2	0	0	0	0	1	0	0	0
2008-09-29	222	l	2			12	1	1	0	1	0	2	0	0	1	2	0	0	0	0
2008-09-29	222	l	3			1	0	0	0	1	0	1	0	0	1	0	0	0	0	0
2008-09-29	222	t	1			5	0	1	0	10	0	4	0	0	1	0	5	0	0	0
2008-09-29	222	t	2			27	0	0	0	29	0	21	1	0	3	6	0	0	0	0
2008-09-29	222	t	3			24	4	0	0	12	0	9	2	0	2	3	0	0	0	0
2008-09-29	3802	t	1			19	0	1	0	7	0	8	3	0	1	0	9	0	0	0
2008-09-29	3852	l	1			11	0	0	0	0	0	0	0	0	0	0	0	0	0	0
2008-09-29	3852	l	2			51	0	0	0	0	0	0	0	0	0	0	0	1	0	0
2008-09-29	3852	l	3			34	0	0	0	0	0	0	0	0	0	0	0	1	0	0
2008-09-29	3802	l	1	0	0	104	61	0	0	3	0	0	0	0	0	0	0	0	0	0
2008-09-29	3802	l	3	0	0	33	4	0	0	2	0	0	0	0	0	2	0	0	0	0
2008-09-29	3802	t	2	0	0	30	4	0	0	3	0	1	0	0	0	1	0	0	0	0
2008-09-29	3802	t	3	0	0	20	3	0	0	3	0	5	1	0	0	0	0	0	0	0
2008-09-30	23	l		0	0	193	3	0	0	36	1	4	1	0	8	0	0	1	7	0
2008-09-30	222	l	1	0	0	7	1	1	0	1	0	3	0	0	0	5	0	0	1	0	1 culex male
2008-09-30	222	l	2	0	0	5	1	0	0	1	0	0	0	0	1	0	0	0	0	0
2008-09-30	222	l	3	0	0	3	0	0	0	2	0	3	0	0	0	1	0	0	0	0
2008-09-30	222	t	1	0	0	12	0	0	0	16	0	26	1	0	0	1	0	0	0	0
2008-09-30	222	t	2	0	0	9	0	0	0	38	0	13	20	0	2	11	0	0	0	0
2008-09-30	222	t	3	0	0	15	0	0	0	16	3	3	3	0	3	1	0	0	0	0
2008-09-30	3802	l	1	0	0	97	1	0	0	0	0	0	0	0	0	0	0	0	0	0
2008-09-30	3802	l	2	0	0	50	5	0	0	6	0	18	0	0	6	0	0	0	10	0
2008-09-30	3802	l	3	0	0	15	2	0	0	0	0	1	0	0	1	0	0	0	0	0
2008-09-30	3802	t	1	0	0	2	0	0	0	10	0	11	3	0	0	0	5	0	1	0
2008-09-30	3802	t	2	0	0	12	0	0	0	6	0	7	2	0	0	0	0	0	0	0
2008-09-30	3802	t	3	0	0	11	0	0	0	14	4	9	2	0	5	0	2	0	0	0
2008-09-30	3852	l		0	0	83	0	0	0	19	2	1	0	0	8	8	1	0	0	0	1 culex male
2008-10-01	23	l		0	0	138	0	0	0	7	1	1	0	0	1	0	0	1	0	0
2008-10-01	222	l	1	0	0	12	1	0	0	5	0	4	1	0	0	0	0	0	0	1
2008-10-01	222	l	2	0	0	5	0	0	0	4	0	0	0	0	0	1	0	0	0	0
2008-10-01	222	l	3	0	0	0	0	0	0	0	0	0	0	0	1	0	0	0	0	0
2008-10-01	222	t	1	0	0	27	0	0	0	28	1	12	1	0	0	0	2	0	0	0
2008-10-01	222	t	2	0	0	25	0	0	0	0	0	25	2	0	0	0	0	0	0	0
2008-10-01	222	t	3	0	0	16	1	0	0	44	2	8	0	0	2	1	0	0	0	0
2008-10-01	3802	l	1	0	0	63	0	0	0	0	0	0	0	0	1	0	0	0	0	0
2008-10-01	3802	l	2	0	0	37	0	0	0	0	0	1	0	0	0	0	0	0	1	0
2008-10-01	3802	l	3	0	0	22	1	0	0	3	0	1	0	0	0	1	0	0	0	0
2008-10-01	3802	t	1	0	0	11	0	0	0	10	0	8	1	0	0	0	1	0	0	0
2008-10-01	3802	t	2	0	0	19	0	0	0	6	0	41	3	0	0	0	0	0	0	0
2008-10-01	3802	t	3	0	0	8	0	0	0	30	0	6	9	0	0	0	0	0	0	0
2008-10-01	3852	l		0	0	107	2	0	0	1	1	1	0	0	0	0	0	0	0	0
2008-10-02	23	l		0	0	205	3	0	0	7	0	1	0	0	1	0	0	0	0	0
2008-10-02	222	l	1	0	0	24	0	0	0	12	0	23	4	0	6	2	0	0	0	0
2008-10-02	222	l	2	0	0	11	0	0	0	9	0	4	1	0	1	0	1	0	0	0
2008-10-02	222	l	3	0	0	2	0	0	0	6	0	1	0	0	0	0	0	0	0	0
2008-10-02	222	t	1	0	0	15	0	0	0	38	2	20	3	0	5	2	1	0	2	0
2008-10-02	222	t	2	0	0	11	0	0	0	14	0	10	0	0	2	0	0	0	0	0
2008-10-02	222	t	3	0	0	9	0	0	0	29	4	23	2	0	1	0	0	0	0	0
2008-10-02	3802	t	1	0	0	21	0	0	0	17	3	13	1	0	1	0	0	0	0	0
2008-10-02	3802	t	2	0	0	11	0	0	0	3	0	4	0	0	0	0	1	0	0	0
2008-10-02	3802	t	3	0	0	16	4	0	0	11	0	3	0	0	0	0	0	0	0	0
2008-10-03	23	l		0	0	223	0	0	0	9	0	12	0	0	3	0	0	0	0	0
2008-10-03	24	l		0	0	442	0	0	0	70	0	16	0	0	6	1	0	2	0	0
2008-10-03	222	l	1	0	0	34	0	0	0	14	0	26	1	0	3	0	0	0	0	0	1 culex male
2008-10-03	222	l	2	0	0	17	0	0	0	19	0	3	0	0	0	0	1	0	0	0
2008-10-03	222	l	3	0	0	15	0	0	0	6	0	8	0	0	1	0	0	1	0	0
2008-10-03	222	t	2	0	0	51	0	0	0	51	0	4	4	4	12	0	0	0	0	0
2008-10-03	222	t	1	0	0	63	0	0	0	82	72	27	0	0	6	0	0	0	6	0
2008-10-03	222	t	3	0	0	37	2	0	0	28	0	39	3	0	2	1	0	0	0	0
2008-10-03	3802	l	2	0	0	172	0	0	0	23	1	16	1	0	1	2	0	0	0	0
2008-10-03	3802	l	3	0	0	110	1	0	0	1	0	7	0	0	0	0	0	0	0	0
2008-10-03	3802	t	2	0	0	57	0	0	0	30	0	98	0	0	2	0	0	0	0	0
2008-10-03	3802	t	1	0	0	57	3	0	0	28	0	25	4	0	4	0	0	1	0	0
2008-10-03	3802	t	3	0	0	100	3	0	0	35	0	30	7	0	2	1	0	0	0	0
2008-10-04	23	l		0	0	247	0	0	0	11	3	12	0	0	2	0	0	0	0	0
2008-10-04	24	l		0	0	121	3	0	0	38	0	13	0	0	7	3	0	0	23	0
2008-10-04	222	l	3	0	0	4	0	0	0	2	1	3	0	0	1	0	0	0	0	0
2008-10-04	222	l	1	0	0	9	1	0	0	1	0	2	0	0	2	2	0	0	11	0
2008-10-04	222	l	2	0	0	10	0	0	0	5	0	3	0	0	0	1	0	0	3	0
2008-10-04	222	t	1	0	0	21	0	0	0	62	0	26	0	0	9	1	0	0	6	0
2008-10-04	222	t	2	0	0	8	1	0	0	23	3	5	1	0	0	0	0	0	0	0
2008-10-04	222	t	3	0	0	14	1	0	0	102	2	13	2	0	2	3	2	0	2	0
2008-10-04	3802	l	1	0	0	76	1	0	0	3	0	14	0	0	5	2	0	0	0	0
2008-10-04	3802	l	3	0	0	116	0	0	0	19	0	6	1	0	6	0	0	0	0	0
2008-10-04	3802	t	1	0	0	94	0	0	0	69	0	6	1	0	0	0	0	0	0	0
2008-10-04	3802	t	2	0	0	17	0	0	0	20	1	38	0	0	2	0	0	0	0	0
2008-10-04	3802	t	3	0	0	28	9	0	0	21	0	22	4	0	0	0	0	0	0	0
2008-10-04	3803	l	2	0	0	19	2	0	0	6	0	0	0	0	0	0	0	0	0	0
2008-10-04	3852	l		0	0	101	0	0	0	0	0	0	0	0	2	1	0	0	0	0
2008-10-05	23	l		0	0	411	2	0	0	1	0	57	1	0	3	0	0	0	0	0
2008-10-05	24	l		0	0	246	3	0	0	31	0	54	2	0	13	3	0	0	4	0
2008-10-05	222	l	1	0	0	26	1	0	0	25	0	51	1	0	14	6	0	0	62	0
2008-10-05	222	l	2	0	0	3	0	0	0	14	0	12	1	0	0	0	2	0	0	2
2008-10-05	222	l	3	0	0	9	0	0	0	6	0	13	0	0	0	0	1	0	0	0
2008-10-05	222	t	1	0	0	35	0	0	0	50	0	73	2	0	12	0	33	0	0	0
2008-10-05	222	t	2	0	0	36	0	0	0	41	4	37	5	0	6	0	1	0	0	0
2008-10-05	222	t	3	0	0	41	0	0	0	43	0	55	6	0	2	0	0	0	0	0
2008-10-05	3802	l	1	0	0	62	1	0	0	0	1	3	1	0	2	0	0	0	2	0
2008-10-05	3802	l	2	0	0	43	0	0	0	2	0	4	0	0	0	0	0	0	1	0
2008-10-05	3802	l	3	0	0	44	3	0	0	4	0	4	0	0	0	0	0	0	0	0
2008-10-05	3802	t	1	0	0	10	0	0	0	10	1	58	2	0	14	0	0	0	1	0
2008-10-05	3802	t	2	0	0	17	0	0	0	19	2	56	3	0	1	0	0	0	0	0
2008-10-05	3802	t	3	0	0	58	9	0	0	29	0	39	3	0	0	0	0	0	0	0
2008-10-05	3852	l		0	0	48	0	0	0	0	0	0		0	0	0	0	0	0	0
2008-10-06	23	l		0	0	159	3	0	0	57	0	47	4	0	0	2	0	0	5	0
2008-10-06	24	l		0	0	270	4	0	0	41	0	21	0	0	4	3	0	0	13	0
2008-10-06	222	l	1	0	0	19	1	0	0	5	0	3	0	0	1	0	0	0	0	1
2008-10-06	222	l	2	0	0	24	0	0	0	4	0	11	0	0	0	0	0	0	0	0
2008-10-06	222	l	3	0	0	19	0	0	0	6	0	8	1	0	0	0	0	0	1	0
2008-10-06	222	t	1	0	0	26	1	0	0	42	0	46	2	0	17	1	0	0	0	0
2008-10-06	222	t	2	0	0	61	0	0	0	51	0	55	4	0	0	0	0	0	0	1
2008-10-06	222	t	3	0	0	28	0	0	0	30	1	50	3	0	0	0	0	0	0	0
2008-10-06	3802	l	1	0	0	62	12	0	0	0	1	0	0	0	0	0	0	0	0	0
2008-10-06	3802	l	2	0	0	42	1	0	0	0	0	0	0	0	0	0	0	0	0	0
2008-10-06	3802	l	3	0	0	36	2	0	0	1	0	7	0	0	0	0	0	0	3	0
2008-10-06	3802	t	1	0	0	44	0	0	0	26	0	56	1	0	0	0	1	0	1	0
2008-10-06	3802	t	2	0	0	21	0	0	0	19	1	33	0	0	0	1	0	1	0	0
2008-10-06	3802	t	3	0	0	51	2	0	0	34	0	34	4	0	2	0	0	0	0	0
2008-10-06	3852	l		0	0	103	0	0	0	3	0	0	0	0	0	0	0	1	0	0
2008-10-07	23	l		0	0	106	0	0	0	0	0	2	0	0	0	0	0	0	0	0		Trap hadn`t cotton wool
2008-10-07	24	l		0	0	125	13	0	0	1	0	2	0	0	0	1	0	0	0	0
2008-10-07	222	t	1	0	0	26	0	0	0	8	0	10	0	0	1	1	0	0	4	0
2008-10-07	222	t	2	0	0	18	0	0	0	7	0	7	1	0	1	0	0	0	0	0
2008-10-07	222	t	3	0	0	4	0	0	0	1	0	1	0	0	0	0	0	0	0	0
2008-10-07	222	t	1	0	0	13	0	0	0	2	0	8	0	0	0	0	0	0	2	0
2008-10-07	222	t	2	0	0	9	0	0	0	0	0	0	0	0	0	0	0	0	0	0
2008-10-07	222	t	3	0	0	4	0	0	0	0	0	0	0	0	0	0		0	0	0
2008-10-07	3802	l	1	0	0	67	30	0	0	0	0	0	0	0	0	0	0	0	0	0
2008-10-07	3802	l	2	0	0	29	2	0	0	0	0	0	0	0	0	0	0	0	3	0
2008-10-07	3802	l	3	0	0	3	0	0	0	0	0	0	0	0	0	0	0	0	0	0
2008-10-07	3802	t	1	0	0	16	0	0	0	2	0	5	0	0	0	0	0	0	0	0
2008-10-07	3802	t	2	0	0	10	0	0	0	5	1	0	0	0	1	1	0	0	0	0
2008-10-07	3802	t	3	0	0	5	1	0	0	0	0	0	0	0	0		0	0	0	0
2008-10-07	3852	l		0	0	91	0	0	0	5	0	4	0	0	0	2	0	0	40	0
2008-10-08	23	l		0	0	143	7	0	0	63	0	11	2	0	2	3	0	0	3	0
2008-10-08	24	l		0	0	53	0	0	0	6	0	2	0	0	0	1	0	0	0	0
2008-10-08	222	l	1	0	0	9	0	0	0	8	0	5	0	0	1	1	0	0	8	0
2008-10-08	222	l	2	0	0	7	0	0	0	3	2	0	1	0	0	0	1	0	1	0
2008-10-08	222	l	3	0	0	2	0	0	0	2	0	1	0	0	0	1	0	0	0	0
2008-10-08	222	t	1	0	0	11	0	0	0	114	0	22	7	0	1	1	0	0	1	0	1 culex male
2008-10-08	222	t	2	0	0	12	0	0	0	70	3	100	16	0	5	0	1	0	0	0
2008-10-08	222	t	3	0	0	11	1	0	0	31	0	42	14	0	0	0	0	0	0	0
2008-10-08	3802	l	1	0	0	24	3	0	0	2	1	0	0	0	0	1	0	0	5	0
2008-10-08	3802	l	2	0	0	18	0	0	0	4	0	1	0	0	0	0	0	0	0	0
2008-10-08	3802	l	3	0	0	5	1	0	0	1	0	0	0	0	0	0	0	0	0	0
2008-10-08	3802	t	1	0	0	12	1	0	0	45	0	12	3	0	2	0	1	0	0	0
2008-10-08	3802	t	2	0	0	12	0	0	0	37	5	49	7	0	2	1	0	0	0	0
2008-10-08	3802	t	3	0	0	19	2	0	0	32	6	6	2	0	0	0	0	1	0	0
2008-10-08	3852	l		0	0	84	0	0	0	12	7	7	0	0	0	0	1	1	1	0
2008-10-09	23	l		0	0	222	2	0	0	3	0	9	2	0	2	1	0	1	0	0
2008-10-09	24	l		0	0	70	1	0	0	14	0	18	2	0	0	1	0	0	0	0
2008-10-09	222	l	1	0	0	4	0	0	0	7	0	1	4	0	2	0	0	0	5	0
2008-10-09	222	l	2	0	0	3	0	0	0	4	5	1	1	0	0	0	0	0	1	0
2008-10-09	222	l	3	0	0	11	0	0	0	4	2	2	0	0	0	1	0	0	0	0
2008-10-09	222	t	1	0	0	3	1	0	0	16	0	2	0	0	2	0	2	0	0	0
2008-10-09	222	t	2	0	0	7	2	0	0	88	1	22	1	0	0	0	0	0	0	0
2008-10-09	222	t	3	0	0	20	0	0	0	24	7	10	19	0	2	0	1	0	1	0
2008-10-09	3802	l	1	0	0	8	0	0	0	13	10	7	0	0	0	0	0	0	0	0
2008-10-09	3802	l	2	0	0	72	0	0	0	16	0	9	0	0	0	0	0	0	0	0
2008-10-09	3802	l	3	0	0	41	1	0	0	1	0	1	1	0	0	0	0	0	0	0
2008-10-09	3802	t	1	0	0	24	0	0	0	0	0	58	21	0	6	0	0	0	0	0
2008-10-09	3802	t	2	0	0	8	1	0	0	32	0	48	13	0	4	0	0	0	0	0
2008-10-09	3802	t	3	0	0	69	14	0	0	25	0	24	14	0	0	0	0	1	0	0
2008-10-09	3852	l		0	0	103	0	0	0	7	8	4	0	0	0	0	0	0	0	0
2008-10-10	23	l		0	0	30	3	0	0	7	0	4	0	0	1	2	0	1	0	0
2008-10-10	24	l		0	0	158	0	0	0	3	0	11	0	0	1	0	0	0	0	0	1 culex male
2008-10-10	222	l	1	0	0	2	0	0	0	1	0	0	1	0	1	1	0	0	0	0
2008-10-10	222	l	2	0	0	6	2	0	0	1	0	0	0	0	0	1	0	0	0	0
2008-10-10	222	l	3	0	0	6	0	0	0	1	1	2	1	0	0	1	0	0	0	0
2008-10-10	222	t	1	0	0	0	0	0	0	23	0	19	9	0	0	1	3	0	0	0	1 culex male
2008-10-10	222	t	2	0	0	14	0	0	0	52	1	31	34	0	1	0	0	0	4	0
2008-10-10	222	t	3	0	0	8	0	0	0	68	0	54	30	0	6	2	0	0	0	0
2008-10-10	3802	l	1	0	0	15	4	0	0	0	1	0	0	0	0	3	0	0	0	0
2008-10-10	3802	l	2	0	0	22	1	0	0	0	0	0	0	0	0	0	0	0	0	0
2008-10-10	3802	l	3	0	0	30	3	0	0	1	0	1	0	0	0	1	0	0	0	0
2008-10-10	3802	t	1	0	0	0	0	0		11	0	8	1	0	0	0	0	0	0	0
2008-10-10	3802	t	2	0	0	5	0	0	0	18	0	8	0	0	0	0	0	0	0	0
2008-10-10	3802	t	3	0	0	13	4	0	0	15	0	15	5	0	0	0	0	0	0	0
2008-10-10	3852	l		0	0	57	1	0	0	1	0	1	0	0	0	0	0	0	0	0
2008-10-11	23	l		0	0	174	0	0	0	3	0	0	0	0	1	0	3	0	0	0
2008-10-11	24	l		0	0	81	5	0	0	1	0	1	0	0	0	0	0	0	0	0
2008-10-11	222	l	3	0	0	2	1	0	0	0	0	0	0	0	0	0	0	0	0	0
2008-10-11	222	l	1	0	0	7	1	0	0	1	0	0	0	0	2	2	0	0	4	0
2008-10-11	222	l	2	0	0	4	0	0	0	0	0	1	0	0	0	1	0	0	0	0
2008-10-11	222	t	3	0	0	4	0	0	0	6	0	8	0	0	3	0	0	0	0	0	2 culex male
2008-10-11	222	t	1	0	0	16	0	0	0	13	0	28	8	0	6	0	0	0	0	0
2008-10-11	222	t	2	0	0	8	0	0	0	15	0	4	0	0	0	1	0	0	0	0
2008-10-11	3802	l	3	0	0	12	3	0	0	0	0	0	0	0	0	1	0	0	0	0	1 culex male
2008-10-11	3802	l	1	0	0	5	2	0	0	0	0	0	0	0	0	0	0	0	0	0
2008-10-11	3802	l	2	0	0	25	9	0	0	0	0	0	0	0	0	1	0	0	0	0
2008-10-11	3802	t	1	0	0	137	0	0	0	1	0	1	2	0	2	0	0	0	0	0
2008-10-11	3802	t	2	0	0	6	0	0	0	5	0	11	3	0	0	2	0	0	0	0
2008-10-11	3802	t	3	0	0	4	2	0	0	2	0	3	0	0	0	1	0	0	1	0
2008-10-11	3852	l		0	0	134	0	0	0	1	0	1	0	0	0	0	0	1	0	0
2008-10-12	23	l		0	0	86	2	0	0	3	0	2	0	0	1	0	0	0	1	0
2008-10-12	24	l		0	0	41	1	0	0	0	0	2	0	0	2	0	1	0	0	0
2008-10-12	222	l	1	0	0	12	3	0	0	2	0	1	0	0	0	0	1	0	1	0
2008-10-12	222	l	2	0	0	4	1	0	0	0	0	0	0	0	0	0	0	0	0	0
2008-10-12	222	l	3	0	0	3	1	0	0	0	0	2	0	0	0	0	0	0	0	0
2008-10-12	222	t	1	0	0	1	0	0	0	14	0	28	1	0	0	0	0	0	0	0
2008-10-12	222	t	2	0	0	7	0	0	0	7	0	8	0	0	1	3	0	0	0	0	1 aedes
2008-10-12	222	t	3	0	0	2	0	0	0	5	0	8	0	0	1	1	0	0	0	0
2008-10-12	3802	l	1	0	0	19	11	0	0	0	0	0	0	0	4	0	2	0	1	0
2008-10-12	3802	l	2	0	0	11	5	0	0	0	0	0	0	0	0	0	0	0	0	0
2008-10-12	3802	l	3	0	0	3	3	0	0	0	0	0	0	0	0	0	0	0	0	0
2008-10-12	3802	t	1	0	0	10	0	0	0	6	0	2	2	0	5	0	3	0	1	0
2008-10-12	3802	t	2	0	0	11	0	0	0	2	1	1	0	0	0	1	0	0	0	0
2008-10-12	3802	t	3	0	0	4	0	0	0	5	0	2	0	0	0	0	0	0	0	0
2008-10-12	3852	l		0	0	34	0	0	0	0	0	0	0	0	0	0	0	0	0	0
2008-10-13	23	l		0	0	39	2	0	0	3	0	1	0	0	0	0	0	0	0	0
2008-10-13	222	l	1	0	0	2	0	0	0	1	0	0	0	0	1	1	0	0	2	0
2008-10-13	222	l	2	0	0	0	0	0	0	0	1	0	0	0	0	0	0	0	0	0
2008-10-13	222	l	3	0	0	2	0	0	0	0	0	0	0	0	0	0	0	0	0	0
2008-10-13	222	t	1	0	0	11	7	0	0	16	0	17	13	0	4	3	0	0	0	0
2008-10-13	222	t	2	0	0	3	3	0	0	7	1	6	3	0	0	0	0	0	1	0
2008-10-13	222	t	3	0	0	7	0	0		14	0	6	3	0	2	0	0	0	0	0
2008-10-13	3802	l	1	0	0	5	3	0	0	0	0	0	0	0	0	0	2	0	0	0
2008-10-13	3802	l	2	0	0	16	3	0	0	0	0	0	0	0	0	3	0	0	0	0
2008-10-13	3802	l	3	0	0	9	2	0	0	0	0	0	0	0	0	0	0	0	0	0
2008-10-13	3802	t	1	0	0	4	0	0	0	20	0	11	9	0	0	0	7	0	0	0
2008-10-13	3802	t	2	0	0	5	0	0	0	6	0	3	1	0	1	0	1	0	0	0
2008-10-13	3802	t	3	0	0	8	1	0	0	16	1	18	3	0	0	0	0	0	0	0
2008-10-13	3852	l		0	0	92	0	0	0	5	0	4	0	0	0	0	1	0	0	0
2008-10-14	23	l		0	0	246	2	0	0	16	0	11	0	0	4	2	0	0	0	0
2008-10-14	24	l		0	0	77	8	0	0	6	0	4	0	0	0	2	1	0	0	0	1 culex male
2008-10-14	222	l	1	0	0	4	1	0	0	3	0	4	0	0	0	0	0	0	3	0
2008-10-14	222	l	2	0	0	0	0	0	0	0	0	0	0	0	0	0	0	0	0	0
2008-10-14	222	l	3	0	0	1	0	0	0	0	0	0	0	0	0	0	0	0	0	0
2008-10-14	222	t	1	0	0	3	2	0	0	35	0	14	11	0	2	0	0	0	7	0
2008-10-14	222	t	2	0	0	8	1	0	0	0	0	26	6	0	0	0	0	0	0	0
2008-10-14	222	t	3	0	0	10	1	0	0	20	0	19	17	0	2	0	0	0	5	0
2008-10-14	3802	l	1	0	0	18	3	0	0	0	1	0	0	0	0	0	1	0	0	0
2008-10-14	3802	l	2	0	0	17	1	0	0	0	0	0	0	0	0	0	0	0	0	0
2008-10-14	3802	l	3	0	0	29	7	0	0	0	0	0	0	0	0	0	1	0	0	0
2008-10-14	3802	t	1	0	0	12	0	0	0	14	0	10	9	0	2	0	7	0	0	0
2008-10-14	3802	t	2	0	0	2	0	0	0	35	0	3	8	0	0	0	8	0	0	0
2008-10-14	3802	t	3	0	0	7	2	0	0	28	1	9	8	0	0	0	2	1	0	0
2008-10-14	3852	l		0	0	80	0	0	0	2	4	1	0	0	0	0	0	0	0	0
2008-10-15	222	l	1	0	0	7	0	0	0	2	0	4	1	0	4	0	0	0	8	0
2008-10-15	222	l	3	0	0	6	0	0	0	0	0	0	0	0	0	0	0	0	0	0
2008-10-15	222	t	2	0	0	6	1	0	0	6	0	13	4	0	1	2	0	0	0	0
2008-10-15	3802	t	1	0	0	8	0	0	0	16	0	23	0	0	0	1	0	0	0	0
				870	1303	15618	801	448	1219	5683	193	3847	524	336	643	263	171	31	312	7
						Species of Anopheles
						Female	(%)	Male	(%)			Other mosquitos species
					funestus	14984		762				Female	(%)	Male	(%)
					marshlii	400		0			africana	5516		190
					tenebrous	609		0			uniform	3609		510
					gambiae	27		0			Uranot	146		0
					letabensis	325		0			Culex	247		12
					Ruphipes	7		0			Aedes	2

## Sheet: house 23 dissections
Date	House	Collection	Number	Species	Condition	Virgin	Plug	Null I	Null II	Sac	No-sac	Gravid	Dissector
2008-09-15	23	l		Af	All	4	6	7	8	13	5	0	Derek
2008-09-16	23	l		Af	All	5	7	7	8	11	13	0	Derek
2008-09-17	23	l		Af	Live	3	16	3	0	4	13	0	Derek
2008-09-17	23	l		Af	Dead	2	4	3	1	13	9	0	Derek
2008-09-18	23	l		Af	Live	4	17	5	4	9	6	0	Derek
2008-09-18	23	l		Af	Dead	2	7	5	1	6	6	0	Derek
2008-09-19	23	l		Af	Live	1	15	7	2	14	4	0	Derek
2008-09-19	23	l		Af	Dead	2	9	5	0	13	3	0	Derek
2008-09-20	23	l		Af	Live	5	16	3	4	15	6	0	Derek
2008-09-20	23	l		Af	Dead	0	10	3	1	7	2	0	Derek
2008-09-21	23	l		Af	Live	1	7	2	0	13	6	0	Derek	1 pos 2 small
2008-09-21	23	l		Af	Dead	0	10	2	0	6	2	0	Derek
2008-09-22	23	l		Af	Live	3	12	9	1	16	4	0	Derek
2008-09-22	23	l		Af	Dead	3	8	7	3	7	2	0	Derek
2008-09-23	23	l		Af	Live	0	8	6	2	9	10	0	Derek
2008-09-23	23	l		Af	Dead	4	4	3	3	9	5	0	Derek
2008-09-24	23	l		Af	All	6	10	8	3	8	7	0	Derek
2008-09-25	23	l		Af	Live	4	15	7	2	6	10	1	Derek
2008-09-25	23	l		Af	Dead	4	8	3	1	5	9	0	Derek
2008-09-26	23	l		Af	Live	3	18	7	1	2	10	0	Derek
2008-09-26	23	l		Af	Dead	1	5	5	3	4	6	0	Derek
2008-09-27	23	l		Af	Live	3	19	11	0	2	7	1	Derek
2008-09-27	23	l		Af	Dead	1	4	7	0	0	6	0	Derek
2008-09-28	23	l		Af	All	3	15	4	4	1	7	0	Derek
2008-10-01	23	l		Af	Live	3	6	2	1	10	5	0	Derek
2008-10-02	23	l		Af	Live	2	9	0	0	17	15	0	Ayubo
2008-10-02	23	l		Af	Live	3	11	1	0	18	4	0	Derek
2008-10-02	23	l		Af	Dead	2	12	2	0	9	8	1	Derek
2008-10-03	23	l		Af	All	3	8	1	1	10	12	0	Derek
2008-10-04	23	l		Af	Live	1	12	0	3	4	14	0	Derek
2008-10-05	23	l		Af	Live	1	17	4	0	14	11	0	Derek
2008-10-05	23	l		Af	Dead	0	7	0	4	10	7	0	Derek
2008-10-06	23	l		Af	Live	4	11	9	4	9	2	0	Derek
2008-10-07	23	l		Af	Live	2	10	2	8	14	9	0	Derek
2008-10-08	23	l		Af	Live	0	17	4	3	8	11	0	Derek
2008-10-08	23	l		Af	Dead	1	7	5	1	10	4	0	Derek
2008-10-09	23	l		Af	Live	3	17	10	7	10	2	0	Derek
2008-10-10	23	l		Af	Live	1	11	7	2	13	5	0	Derek
2008-10-11	23	l		Af	Live	1	6	11	3	3	6	0	Derek
2008-10-12	23	l		Af	Live	0	5	2	1	5	1	0	Derek
2008-10-13	23	l		Af	Live	1	4	1	0	3	4	0	Ayubo	Other half dissected by Derek
2008-10-13	23	l		Af	Dead	0	0	0	0	3	1	0	Derek
2008-10-13	23	l		Af	Live	4	4	3	0	6	1	0	Derek
2008-10-14	23	l		Af	Live	4	10	2	0	9	6	0	Ayubo	Other half dissected by Derek
2008-10-14	23	l		Af	Live	3	8	6	3	5	5	1	Derek
2008-10-14	23	l		Af	Live	1	0	9	1	1	1	0	Derek	19:30:00
2008-10-15	23	l		Af	Live	2	6	4	0	12	8	0	Derek
Date	Virgin	Plug	Null I	Null II	Sac	No-sac	Total	parous	parous rate	prop with sacs	propn virgin	propn with plug
2008-09-15	4	6	7	8	13	5	43	18	0.418605	0.722222	0.235294	0.352941
2008-09-16	5	7	7	8	11	13	51	24	0.470588	0.458333	0.263158	0.368421
2008-09-17	5	20	6	1	17	22	71	39	0.549296	0.435897	0.16129	0.645161
2008-09-18	6	24	10	5	15	12	72	27	0.375	0.555556	0.15	0.6
2008-09-19	3	24	12	2	27	7	75	34	0.453333	0.794118	0.0769231	0.615385
2008-09-20	5	26	6	5	22	8	72	30	0.416667	0.733333	0.135135	0.702703
2008-09-21	1	17	4	0	19	8	49	27	0.55102	0.703704	0.0454545	0.772727
2008-09-22	6	20	16	4	23	6	75	29	0.386667	0.793103	0.142857	0.47619
2008-09-23	4	12	9	5	18	15	63	33	0.52381	0.545455	0.16	0.48
2008-09-24	6	10	8	3	8	7	42	15	0.357143	0.533333	0.25	0.416667
2008-09-25	8	23	10	3	11	19	74	30	0.405405	0.366667	0.195122	0.560976
2008-09-26	4	23	12	4	6	16	65	22	0.338462	0.272727	0.102564	0.589744
2008-09-27	4	23	18	0	2	13	60	15	0.25	0.133333	0.0888889	0.511111
2008-09-28	3	15	4	4	1	7	34	8	0.235294	0.125	0.136364	0.681818
2008-10-01	3	6	2	1	10	5	27	15	0.555556	0.666667	0.272727	0.545455
2008-10-02	7	32	3	0	44	27	113	71	0.628319	0.619718	0.166667	0.761905
2008-10-03	3	8	1	1	10	12	35	22	0.628571	0.454545	0.25	0.666667
2008-10-04	1	12	0	3	4	14	34	18	0.529412	0.222222	0.0769231	0.923077
2008-10-05	1	24	4	4	24	18	75	42	0.56	0.571429	0.0344828	0.827586
2008-10-06	4	11	9	4	9	2	39	11	0.282051	0.818182	0.166667	0.458333
2008-10-07	2	10	2	8	14	9	45	23	0.511111	0.608696	0.142857	0.714286
2008-10-08	1	24	9	4	18	15	71	33	0.464789	0.545455	0.0294118	0.705882
2008-10-09	3	17	10	7	10	2	49	12	0.244898	0.833333	0.1	0.566667
2008-10-10	1	11	7	2	13	5	39	18	0.461538	0.722222	0.0526316	0.578947
2008-10-11	1	6	11	3	3	6	30	9	0.3	0.333333	0.0555556	0.333333
2008-10-12	0	5	2	1	5	1	14	6	0.428571	0.833333	0	0.714286
2008-10-13	5	8	4	0	12	6	35	18	0.514286	0.666667	0.294118	0.470588
2008-10-14	8	18	17	4	15	12	74	27	0.364865	0.555556	0.186047	0.418605
2008-10-15	2	6	4	0	12	8	32	20	0.625	0.6	0.166667	0.5

## Sheet: 2012 exit collections
Date	house	nome	unfed	gravid	male
2012-11-01	10	rute	10	6	178
2012-11-01	150	benilde	16	17	173
2012-11-01	3258	pascoal	3	4	101
2012-11-01	3850	mariamo	3	18	44
2012-11-01	3890	beti	1	4	66
2012-11-01	3900	farida	11	2	79
2012-11-01	3904	tomas	8	3	171
2012-11-01	3906	juvencia	12	11	148
2012-11-01	ct4	tina	7	4	90
2012-10-31	10	rute	5	2	156
2012-10-31	24	amelia	2	1	86
2012-10-31	150	benilde	19	21	146
2012-10-31	3258	pascoal	3	1	129
2012-10-31	3804	isabel	3	2	48
2012-10-31	3850	mariamo	2	37	158
2012-10-31	3890	beti	1	7	43
2012-10-31	3904	tomas	7	3	68
2012-10-31	3906	juvencia	5	9	218
2012-10-30	10	rute	26	3	206
2012-10-30	24	amelia	13	5	160
2012-10-30	150	benilde	14	8	138
2012-10-30	3258	pascoal	4	1	98
2012-10-30	3804	isabel	4	4	102
2012-10-30	3850	mariamo	4	6	96
2012-10-30	3890	beti	3	7	63
2012-10-30	3904	tomas	15	6	117
2012-10-30	3906	juvencia	13	5	103
2012-10-29	150	benilde	15	1	98
2012-10-29	3804	isabel	0	0	16
2012-10-29	3850	mariamo	6	30	56
2012-10-29	3890	beti	5	8	44
2012-10-29	3904	tomas	2	3	70
2012-10-29	ct4	tina	6	12	143
2012-10-15	10	rute	22	8	100
2012-10-15	24	antonio	18	3	134
2012-10-15	150	benilde	12	7	70
2012-10-15	234	pascoal	16	3	193
2012-10-15	3804	isabel	5	7	43
2012-10-15	3856	mariamo	4	1	14
2012-10-15	3900	farida	7	12	48
2012-10-15	3906	juvencia	27	11	80
2012-10-15	ct4	tina	0	0	0
2012-10-14	10	rute	7	1	55
2012-10-14	150	benilde	21	11	56
2012-10-14	3258	pascoal	4	4	2
2012-10-14	3804	isabel	6	18	61
2012-10-14	3850	beti	2	13	44
2012-10-14	3856	mariamo	10	2	6
2012-10-14	3900	farida	5	3	66
2012-10-14	ct4	tina	10	0	74
2012-10-11	150	benilde	0	2	6
2012-10-11	3258	pascoal	20	25	133
2012-10-11	3856	mariamo	28	10	98
2012-10-11	3890	beti	7	16	33
2012-10-11	3900	farida	9	16	92
2012-10-11	3906	juvencia	8	6	46
2012-10-11	ct4	tina	8	5	30
2012-10-10	10	rute	26	11	120
2012-10-10	150	benilde	11	4	130
2012-10-10	3258	pascoal	13	32	38
2012-10-10	3804	isabel	8	9	87
2012-10-10	3856	mariamo	11	5	80
2012-10-10	3890	beti	1	3	22
2012-10-10	3900	farida	7	4	24
2012-10-10	3906	juvencia	56	43	284
2012-10-10	ct4	tina	12	8	84
2012-10-09	10	rute	36	20	129
2012-10-09	150	benilde	16	17	72
2012-10-09	3804	isabel	1	11	63
2012-10-09	3850	mariamo	7	4	46
2012-10-09	3889	pascoal	14	61	86
2012-10-09	3890	farida	1	0	0
2012-10-09	3890	beti	6	8	26
2012-10-09	3906	juvencia	48	35	230
2012-10-09	ct4	tina	14	2	93
2012-10-08	10	rute	37	4	224
2012-10-08	24	amelia	17	5	138
2012-10-08	150	benilde	8	7	96
2012-10-08	3258	pascoal	2	36	125
2012-10-08	3850	mariamo	6	2	26
2012-10-08	3890	beti	6	6	58
2012-10-08	3900	farida	17	6	124
2012-10-08	ct4	tina	13	2	91
2012-10-07	24	amelia	11	2	110
2012-10-07	150	benilde	3	3	53
2012-10-07	234	pascoal	15	2	173
2012-10-07	3804	isabel	2	10	117
2012-10-07	3850	mariamo	4	1	17
2012-10-07	3890	beti	2	2	19
2012-10-07	3900	farida	8	6	44
2012-10-07	3906	juvencia	33	12	201
2012-10-07	ct4	tina	12	2	99
2012-10-04	10	rute	10	2	88
2012-10-04	10	rute	1	0	153
2012-10-04	24	amelia	18	11	73
2012-10-04	150	benilde	13	10	86
2012-10-04	150	benilde	21	8	112
2012-10-04	234	pascoal	6	3	171
2012-10-04	3258	pascoal	3	6	110
2012-10-04	3850	mariamo	13	2	181
2012-10-04	3890	beti	3	3	43
2012-10-04	3900	farida	7	12	48
2012-10-04	3904	tomas	8	3	120
2012-10-04	3906	juvencia	18	10	150
2012-10-04	3906	juvencia	12	18	228
2012-10-04	ct4	tina	10	2	74
2012-10-03	10	rute	42	9	112
2012-10-03	150	benilde	75	48	146
2012-10-03	3804	isabel	8	18	39
2012-10-03	3850	mariamo	31	8	82
2012-10-03	3890	beti	6	5	46
2012-10-03	3900	farida	1	2	18
2012-10-03	3906	juvencia	58	10	162
2012-10-03	ct4	tina	33	2	106
2012-10-01	10	rute	15	6	96
2012-10-01	150	benilde	28	11	146
2012-10-01	234	pascoal	15	2	51
2012-10-01	3804	isabel	13	23	115
2012-10-01	3890	beti	3	3	37
2012-10-01	3900	farida	11	6	173
2012-10-01	3906	juvencia	24	5	156
2012-10-01	ct4	tina	20	0	104
2012-09-30	10	rute	58	10	190
2012-09-30	150	benilde	46	33	154
2012-09-30	234	pascoal	8	11	130
2012-09-30	3804	isabel	16	11	154
2012-09-30	3890	beti	11	6	96
2012-09-30	3906	juvencia	31	21	222
2012-09-30	ct4	tina	19	3	112
2012-09-27	150	benilde	23	12	121
2012-09-27	234	pascoal	5	2	78
2012-09-27	3850	mariamo	9	3	62
2012-09-27	3890	beti	3	4	36
2012-09-27	3900	farida	1	0	6
2012-09-27	3906	juvencia	18	13	173
2012-09-25	150	benilde	42	19	92
2012-09-25	3250	mariamo	4	4	36
2012-09-25	3804	isabel	2	16	47
2012-09-25	3890	beti	5	9	13
2012-09-25	3900	farida	3	23	41
2012-09-25	ct4	tina	5	8	55
2012-09-24	10	rute	7	1	60
2012-09-24	150	benilde	26	26	101
2012-09-24	3804	isabel	28	3	31
2012-09-24	3850	mariamo	9	5	20
2012-09-24	3900	farida	8	7	29
2012-09-24	3906	juvencia	34	*	150
2012-09-24	ct4	tina	30	10	103
2012-09-23	150	benilde	10	6	3
2012-09-23	234	pascoal	0	0	15
2012-09-23	3804	isabel	2	4	36
2012-09-23	3850	mariamo	22	0	43
2012-09-23	3900	farida	12	0	3
2012-09-23	3906	juvencia	10	3	5
2012-09-23	ct4	tina	10	1	18
2012-09-20	10	rute	3	2	60
2012-09-20	150	benilde	25	12	165
2012-09-20	234	pascoal	6	11	194
2012-09-20	3850	mariamo	14	11	33
2012-09-20	3890	beti	4	3	16
2012-09-20	3900	farida	4	5	58
2012-09-20	3906	juvencia	43	13	234
2012-09-20	ct4	tina	6	2	68
2012-09-19	10	rute	16	0	50
2012-09-19	150	benilde	39	4	224
2012-09-19	3850	mariamo	9	3	49
2012-09-19	3890	beti	1	3	39
2012-09-19	3900	farida	8	1	33
2012-09-19	3906	juvencia	30	12	146
2012-09-19	ct4	tina	9	8	89
2012-09-18	10	rute	29	13	87
2012-09-18	150	benilde	26	1	158
2012-09-18	234	pascoal	27	86	167
2012-09-18	3804	isabel	2	13	46
2012-09-18	3850	mariamo	5	5	56
2012-09-18	3890	beti	3	5	47
2012-09-18	3900	farida	10	7	60
2012-09-18	3906	juvencia	28	4	207
2012-09-18	ct4	tina	6	4	56
2012-09-17	10	rute	1	2	46
2012-09-17	150	benilde	6	4	40
2012-09-17	234	pascoal	13	62	148
2012-09-17	3804	isabel	1	9	43
2012-09-17	3850	mariamo	1	6	23
2012-09-17	3890	beti	11	2	38
2012-09-17	3906	juvencia	20	14	126
2012-09-17	ct4	tina	2	1	48
2012-09-16	10	rute	13	13	126
2012-09-16	150	benilde	8	7	106
2012-09-16	234	pascoal	14	30	93
2012-09-16	3804	isabel	8	18	74
2012-09-16	3850	mariamo	1	9	60
2012-09-16	3890	beti	3	4	56
2012-09-16	3906	juvencia	22	2	98
2012-09-16	ct4	tina	8	3	70
2012-09-13	150	benilde	8	7	110
2012-09-13	234	pascoal	3	2	118
2012-09-13	3850	mariamo	6	2	38
2012-09-13	3890	beti	7	6	49
2012-09-13	3900	farida	7	3	51
2012-09-13	ct4	tina	15	1	120
2012-09-12	150	benilde	6	4	179
2012-09-12	234	pascoal	1	0	173
2012-09-12	3850	mariamo	8	4	88
2012-09-12	3900	farida	0	3	15
2012-09-12	3906	juvencia	12	16	219
2012-09-10	10	rute	3	8	196
2012-09-10	150	benilde	17	0	123
2012-09-10	3850	mariamo	8	4	109
2012-09-10	3890	beti	4	3	50
2012-09-10	3900	farida	2	7	106
2012-09-10	3906	juvencia	16	14	190
2012-09-10	ct4	tina	4	9	101
2012-09-06	150	benilde	15	3	3
2012-09-06	234	pascoal	8	24	26
2012-09-06	3234	tomas	9	1	334
2012-09-06	ct4	tina	12	4	118
2012-09-05	10	rute	23	16	167
2012-09-05	24	amelia	17	4	33
2012-09-05	150	benilde	20	4	100
2012-09-05	3804	isabel	2	24	92
2012-09-05	3850	mariamo	0	2	23
2012-09-05	3852	ricardina	8	1	131
2012-09-05	3890	beti	6	2	50
2012-09-05	3906	juvencia	39	9	154
2012-09-05	ct4	tina	20	2	75
2012-09-04	10	rute	16	22	208
2012-09-04	24	amelia	8	4	82
2012-09-04	150	benilde	8	4	64
2012-09-04	3234	tomas	13	6	137
2012-09-04	3804	isabel	0	11	48
2012-09-04	3850	mariamo	8	5	46
2012-09-04	3890	beti	2	8	21
2012-09-04	3900	farida	3	10	38
2012-09-04	3906	juvencia	17	5	271
2012-09-04	ct4	tina	9	5	117
2012-09-03	10	rute	45	6	69
2012-09-03	150	benilde	6	0	4
2012-09-03	3804	isabel	7	7	68
2012-09-03	3852	ricardina	1	1	28
2012-09-03	3890	beti	8	0	2
2012-09-03	3900	farida	4	2	58
2012-09-03	ct4	tina	35	0	88
2012-09-02	10	rute	21	6	70
2012-09-02	10	rute	9	8	196
2012-09-02	24	amelia	4	1	43
2012-09-02	150	benilde	7	6	65
2012-09-02	150	benilde	18	29	151
2012-09-02	234	pascoal	24	14	201
2012-09-02	3234	tomas	1	2	148
2012-09-02	3804	isabel	5	16	80
2012-09-02	3850	mariamo	5	2	87
2012-09-02	3890	beti	6	1	56
2012-09-02	3900	farida	5	2	116
2012-09-02	3906	juvencia	4	5	182
2012-09-02	3906	juvencia	26	7	203
2012-09-02	ct4	tina	16	0	98

## Sheet: tent light proportions by moon
Collection	Time	live Af	Af tot fem	marsh	Mansonia	Mans afr	Ms unf	An t	Cx	Sp A	Af tot fem	marsh
l Average	waxing	1	81.8704	0.0185185	0	10.1111	9.31481	2.05556	0.814815	0.111111	-17.1217	-23.8236
t Average	waxing	1	29.1667	0	0	30.3571	27.7857	2.7619	0.571429	1.16667	1.43537	-0.795918
l Average	full	2	36.9556	0.566667	1.4	2.63333	1.37778	0.511111	0.544444	0.155556	-8.49802	-11.6127
t Average	full	2	11.3659	0.0487805	9.575	11.7439	9.40244	1.28049	0.345679	0.333333	-0.0042164	-1.23003
l Average	waning	3	48.8909	4.72727	0.654545	5.07273	0.854545	1.38182	0.763636	0.109091	-11.6571	-15.9825
t Average	waning	3	7.45455	0.136364	6.40909	18.8864	3.65909	0.977273	0.818182	0.681818	0.831981	-0.0670996
l Average	no moon	4	31.8689	1.27869	0	6.18033	3.7377	1.16393	0.327869	0.262295	0.0655738	0.0491803
t Average	no moon	4	17.1364	1.09091	0.204545	26.7045	19.2273	1.70455	0.454545	0.534884	0.162791	0.363636
